# Supplementary material for: Per- and polyfluoroalkyl substances (PFAS) and other contaminants of concern in tribal waters of Montana
Source: Royal Society of Chemistry journal article supplement (doi:10.1039/d5em00565e), 2026-01-01
Supplement: d5em00565e1.xlsx [file d5em00565e1.xlsx]

## Sheet: COVER PAGE
SUPPLEMENTARY MATERIAL
Per- and polyfluoroalkyl Substances (PFAS) and other Contaminants of Concern in Tribal Waters of Montana
Kelly L. Smalling1*, Paul M. Bradley2, Kristin M. Romanok1, John T. Doyle3,5, Margaret J. Eggers4,5**, Christine Martin5***, Elliott P. Barnhart6, Picabo Binette7, Eric M. Castro5,8, Madisan Chavez5,8, Stephanie A. Ewing8, Stephanie E. Gordon9, Mathew W. Fields4,10, James L. Gray11, Ashley M. Groshong7, Chiachi Hwang10, Leslie K. Kanagy11, JoRee WClay LaFrance12,5, Keith A. Loftin13, Carrie Mae L…
1U.S. Geological Survey, Lawrenceville, New Jersey, USA; 2U.S. Geological Survey, Columbia, South Carolina, USA; 3Little Big Horn College, Crow Agency, Montana, USA; 4Department of Microbiology and Cell Biology, Montana State University, Bozeman, Montana, USA; 5Crow Water Quality Project, Crow Agency, Montana, USA; 6U.S. Geological Survey, Helena, Montana, USA, 7Laboratory of Bacteriology, Rocky …
** Current Affiliation: Environmental Health Program, Land Resources and Environmental Sciences, Montana State University, Bozeman, Montana, USA
*** Current Affiliation: Human Development and Community Health, Montana State University, Bozeman, Montana, USA
**** Current Affiliation: Health Research and Development Branch, Division of Research Capacity Building, National Institute of General Medical Sciences, National Institutes of Health, Bethesda, Maryland, USA
Contents: Cover Page, 5 Figures, 10 Tables
The contributions of the NIH authors were made as part of their official duties as NIH federal staff, are in compliance with agency policy requirements, and are considered Works of the United States Government. The findings and conclusions presented in this paper do not necessarily reflect the views of the NIH or the Department of Health and Human Services. Any use of trade, firm, or product name…

## Sheet: FIGURE SI. ORGANICS
Fig S1. Cumulative concentrations of all organics (a), pharmaceuticals (b), volatile organic compounds (VOCs; c) and pesticides (d) detected during 2022 (black circles) and 2023 (yellow circles) in surface water samples collected from up to nine sites in the Little Bighorn River (LBH), two sites in the Bighorn River drainage (BH) and two sites in the Pryor Creek drainage (PC) within the Crow Rese…

## Sheet: FIGURE S2. INORGANICS
Fig S2. Concentrations (in units shown) of arsenic (As, a), lead (Pb, b), fluoride (F, c), uranium (U, d),manganese (Mn, e), lithium (Li, f), nitrate-nitrogen (NO3-N, g), selenium (Se, h), boron (B, i) and strontium (Sr, j) detected during 2022 (black circles) and 2023 (yellow circles) in surface water samples collected from up to nine sites in the Little Bighorn River (LBH), two sites in the Big…

## Sheet: FIGURE S3. TQ ACUTE
Fig S3. Benchmark-based toxicity quotients (TQ) based on acute water quality standards for freshwater species (top), and aquatic life benchmarks for fish (middle) and invertebrates (bottom) at the thirteen surface water sampling locations in the Bighorn River (BH), Little Bighorn River (LBH) and Pryor Creek (PC) within the Crow Reservation, Montana. Red triangle represents the cumulative toxicity…

## Sheet: FIGURE S4. TQ HH AND RECREATION
Fig S3. Benchmark-based toxicity quotients (TQ) benchmark based toxicity quotients for inorganic and organic analytes for drinking water (top) and contact through recreation (bottom) in the thirteen surface water sampling locations in the Bighorn River (BH), Little Bighorn River (LBH) and Pryor Creek (PC) within the Crow Reservation, Montana. Red triangle represents the cumulative toxicity quotie…

## Sheet: FIGURE S5 BIOFILM COMMUNITY
Figure S5. Relative abundance, represented as a percent, of prokaryotic sequences at the class level in biofilms collected from five sites on the Little Big Horn River, Montana.

## Sheet: TABLE SI. SITE INFORMATION
USGS Station number	USGS Station name	Site code	Drainage basin	Year sampled	Surface water	Sediment	Biofilms	Fish
USGS-452541108325301	Plenty Coups State Park Spring at Pryor, MT	PC1	Pryor Creek	2023	X	X
USGS-452458108333602	Pryor Creek at Sundance Bridge, near Pryor, MT	PC2	Pryor Creek	2023	X	X
USGS-451846107553203	Ft Smith WW Lagoon at Ft Smith, MT	BH1	Bighorn River	2023	X
USGS-453206107431604	Unnamed pond nr Co Rd 313, St Xavier, MT	BH2*	Bighorn River	2023	X	X
USGS-450300107340401	Little Big Horn R ab Sport Ck nr Wyola, MT	LBH1	Little Bighorn River	2023				X
USGS-451257107225201	Little Bighorn R nr Sloan Ditch nr Wyola MT	LBH2	Little Bighorn River	2022, 2023	X	X	X
USGS-451943107212513	L Bighorn R bl Lodge Grass Cr nr Lodge Grass MT	LBH3	Little Bighorn River	2022, 2023	X	X	X
USGS-452259107230811	Irr OF to L Big Horn R Oxbow nr Lodge Grass, MT	LBH4*	Little Bighorn River	2023	X	X
USGS-453139107245712	Irrigation ditch near Garryowen, MT	LBH5*	Little Bighorn River	2023	X	X
USGS-453254107251316	L Bighorn R bl Med Tail Coulee nr Crow Agency MT	LBH6	Little Bighorn River	2022, 2023	X	X	X
USGS-453535107275515	Little Bighorn R ab Agency Canal nr Crow Agency MT	LBH7	Little Bighorn River	2022, 2023	X	X	X	X
USGS-453615107271309	L Bighorn R bl Heritage Rd brdg at Crow Agency MT	LBH8	Little Bighorn River	2022, 2023	X	X	X
USGS-453657107270401	Little Bighorn R at Pitch's nr Crow Agency, MT	LBH9	Little Bighorn River	2022, 2023	X	X
USGS-453554107272606	Little Bighorn R bl Custer Cr, at Crow Agency, MT	LBH10	Little Bighorn River	2023		X
Table S1. Site information for samples collected in Montana, 2022-23. Information includes the year or years sampled and the types of samples collected at each site. Surface-water samples were analyzed for a variety of organic and inorganic contaminants. Sediment, biofilms and fish (tissue and whole blood) samples were only analyzed for per- and polyfluoroalkyl substances (PFAS). Method informati…
[USGS, U.S. Geological Survey; *, indicates site is not along the main stem of river.]

## Sheet: TABLE S2. SW METHODS
Parameter name	CAS number	Analyzing laboratory	Common use group	Method	Reporting level type	Detection limit	Reporting limit	Units of measurement	Method citation abbreviation
Alkalinity	--	RCL	Field measurement	Fixed endpoint	MDL	--	2	mg/L as CaCO3	Fishman and Friedman, 1989
Dissolved oxygen	--	Field personnel	Field measurement	Multi-parameter sonde	--	--	0	mg/L	USGS National field manual, variously dated
pH	--	Field personnel	Field measurement	Multi-parameter sonde	--	--	0.01	standard units	USGS National field manual, variously dated
Specific conductance at 25C	--	Field personnel	Field measurement	Multi-parameter sonde	--	--	5	uS/cm @ 25C	USGS National field manual, variously dated
Temperature, water	--	Field personnel	Field measurement	Multi-parameter sonde	--	--	0.1	deg C	USGS National field manual, variously dated
Turbidity	--	Field personnel	Field measurement	Multi-parameter sonde	--	--	0	FNU	USGS National field manual, variously dated
Bromide	24959-67-9	RCL	Inorganic-anion	IC	MDL	--	0.05	mg/L	Pfaff, 1993
Chloride	16887-00-6	RCL	Inorganic-anion	IC	MDL	--	0.1	mg/L	Brinton and others, 1996
Fluoride	16984-48-8	RCL	Inorganic-anion	IC	MDL	--	0.05	mg/L	Pfaff, 1993
Nitrate	14797-55-8	RCL	Inorganic-nutrient	IC	MDL	--	0.05	mg/L as N	Brinton and others, 1996
Sulfate	14808-79-8	RCL	Inorganic-anion	IC	MDL	--	0.1	mg/L	Brinton and others, 1996
Calcium	7440-70-2	ATECL	Inorganic-nutrient	ICP-MS	MDL	--	0.02	mg/L	Roth and others, 2022
Magnesium	7439-95-4	RCL	Inorganic-cation	ICP-OES	MDL	--	0.01	mg/L	EPA, 2018
Potassium	7440-09-7	RCL	Inorganic-cation	ICP-OES	MDL	--	0.02	mg/L	EPA, 2018
Sodium	7440-23-5	RCL	Inorganic-cation	ICP-OES	MDL	--	0.2	mg/L	EPA, 2018
Phosphorus	7723-14-0	ATECL	Inorganic-nutrient	ICP-MS	MDL	--	1.0	ug/L	Roth and others, 2022
Phosphorus	7723-14-0	RCL	Inorganic-TE	ICP-OES	MDL	--	40	ug/L	EPA, 2018
Aluminum	7429-90-5	RCL	Inorganic-TE	ICP-OES	MDL	--	2	ug/L	EPA, 2018
Antimony*	7440-36-0	ATECL	Inorganic-TE	ICP-MS	MDL	--	0.003	ug/L	Roth and others, 2022
Antimony	7440-36-0	RCL	Inorganic-TE	ICP-OES	MDL	--	30	ug/L	EPA, 2018
Arsenic*	7440-38-2	ATECL	Inorganic-TE	ICP-MS	MDL	--	0.02	ug/L	Roth and others, 2022
Arsenic	7440-38-2	RCL	Inorganic-TE	ICP-OES	MDL	--	1.0	ug/L	EPA, 2018
Barium	7440-39-3	RCL	Inorganic-TE	ICP-OES	MDL	--	0.5	ug/L	EPA, 2018
Beryllium	7440-41-7	RCL	Inorganic-TE	ICP-OES	MDL	--	0.5	ug/L	EPA, 2018
Boron	7440-42-8	RCL	Inorganic-TE	ICP-OES	MDL	--	5	ug/L	EPA, 2018
Cadmium*	7440-43-9	ATECL	Inorganic-TE	ICP-MS	MDL	--	0.0008	ug/L	Roth and others, 2022
Cadmium	7440-43-9	RCL	Inorganic-TE	ICP-OES	MDL	--	2.0	ug/L	EPA, 2018
Chromium	7440-47-3	RCL	Inorganic-TE	GFAAS	LT-MDL	--	0.3	ug/L	Ball and McCleskey, 2003
Chromium(VI)	18540-29-9	RCL	Inorganic-TE	GFAAS	LT-MDL	--	0.3	ug/L as Cr	Ball and McCleskey, 2003
Cobalt*	7440-48-4	ATECL	Inorganic-TE	ICP-MS	MDL	--	0.005	ug/L	Roth and others, 2022
Cobalt	7440-48-4	RCL	Inorganic-TE	ICP-OES	MDL	--	2	ug/L	EPA, 2018
Copper	7440-50-8	RCL	Inorganic-TE	ICP-OES	MDL	--	1	ug/L	EPA, 2018
Iron	7439-89-6	RCL	Inorganic-TE	ICP-OES	MDL	--	1	ug/L	EPA, 2018
Lead*	7439-92-1	ATECL	Inorganic-TE	ICP-MS	MDL	--	0.400	ug/L	Roth and others, 2022
Lead	7439-92-1	RCL	Inorganic-TE	ICP-OES	MDL	--	0.0005	ug/L	EPA, 2018
Lithium	7439-93-2	RCL	Inorganic-TE	ICP-OES	MDL	--	0.5	ug/L	EPA, 2018
Manganese	7439-96-5	RCL	Inorganic-TE	ICP-OES	MDL	--	1	ug/L	EPA, 2018
Mercury	7439-97-6	WIMRL	Inorganic-TE	CVAFS	MDL	--	0.17	ng/L	EPA, 2022
Molybdenum*	7439-98-7	ATECL	Inorganic-TE	ICP-MS	MDL	--	0.020	ug/L	Roth and others, 2022
Molybdenum	7439-98-7	RCL	Inorganic-TE	ICP-OES	MDL	--	4.0	ug/L	EPA, 2018
Nickel*	7440-02-0	ATECL	Inorganic-TE	ICP-MS	MDL	--	0.200	ug/L	Roth and others, 2022
Nickel	7440-02-0	RCL	Inorganic-TE	ICP-OES	MDL	--	3.0	ug/L	EPA, 2018
Phosphorus	7723-14-0	RCL	Inorganic-TE	ICP-OES	MDL	--	40	ug/L	EPA, 2018
Selenium*	7782-49-2	ATECL	Inorganic-TE	ICP-MS	MDL	--	0.200	ug/L	Roth and others, 2022
Selenium	7782-49-2	RCL	Inorganic-TE	ICP-OES	MDL	--	2.0	ug/L	EPA, 2018
Silica as Silicon dioxide	7631-86-9	RCL	Inorganic-TE	ICP-OES	MDL	--	0.02	mg/L	EPA, 2018
Silver	7440-22-4	ATECL	Inorganic-TE	ICP-MS	MDL	--	0.003	ug/L	Roth and others, 2022
Strontium	7440-24-6	RCL	Inorganic-TE	ICP-OES	MDL	--	0.5	ug/L	EPA, 2018
Thallium	7440-28-0	ATECL	Inorganic-TE	ICP-OES	MDL	--	0.0002	ug/L	Roth and others, 2022
Uranium	7440-61-1	ATECL	Inorganic-TE	ICP-MS	MDL	--	0.0007	ug/L	Roth and others, 2022
Vanadium	7440-62-2	ATECL	Inorganic-TE	ICP-MS	MDL	--	0.200	ug/L	Roth and others, 2022
Zinc	7440-66-6	RCL	Inorganic-TE	ICP-OES	MDL	--	1	ug/L	EPA, 2018
Escherichia coli (E. Coli)	--	NIH/NIAID	Microbiology	Coliblue24 broth	count	--	0	CFU/100 mL	HACH, 1999
Heterotrohic plate count	--	NIH/NIAID	Microbiology	R2A agar	count	--	0	CFU/mL	Described in metadata process step
Total coliforms	--	NIH/NIAID	Microbiology	Coliblue24 broth	count	--	0	CFU/100 mL	HACH, 1999
1,1,1-Trichloro-2-propanone	918-00-3	OCRL	Disinfection by-product	GC-MS	MDL	--	0.5	ug/L	Hladik and others, 2014
1,1-Dichloro-2-propanone	513-88-2	OCRL	Disinfection by-product	GC-MS	MDL	--	0.5	ug/L	Hladik and others, 2014
Bromoacetonitrile	590-17-0	OCRL	Disinfection by-product	GC-MS	MDL	--	0.1	ug/L	Hladik and others, 2014
Bromochloroacetonitrile	83463-62-1	OCRL	Disinfection by-product	GC-MS	MDL	--	0.5	ug/L	Hladik and others, 2014
Bromochloroiodomethane	34970-00-8	OCRL	Disinfection by-product	GC-MS	MDL	--	0.05	ug/L	Hladik and others, 2014
Bromochloronitromethane	135531-25-8	OCRL	Disinfection by-product	GC-MS	MDL	--	1	ug/L	Hladik and others, 2014
Bromodichloromethane	75-27-4	OCRL	Disinfection by-product	GC-MS	MDL	--	0.05	ug/L	Hladik and others, 2014
Bromodiiodomethane	557-95-9	OCRL	Disinfection by-product	GC-MS	MDL	--	0.05	ug/L	Hladik and others, 2014
Bromonitromethane	563-70-2	OCRL	Disinfection by-product	GC-MS	MDL	--	1	ug/L	Hladik and others, 2014
Chlorodiiodomethane	638-73-3	OCRL	Disinfection by-product	GC-MS	MDL	--	0.05	ug/L	Hladik and others, 2014
Chloropicrin	76-06-2	OCRL	Disinfection by-product	GC-MS	MDL	--	1	ug/L	Hladik and others, 2014
Dibromoacetonitrile	3252-43-5	OCRL	Disinfection by-product	GC-MS	MDL	--	1	ug/L	Hladik and others, 2014
Dibromochloromethane	124-48-1	OCRL	Disinfection by-product	GC-MS	MDL	--	0.05	ug/L	Hladik and others, 2014
Dibromoiodomethane	593-94-2	OCRL	Disinfection by-product	GC-MS	MDL	--	0.05	ug/L	Hladik and others, 2014
Dichloroacetonitrile	107-14-2	OCRL	Disinfection by-product	GC-MS	MDL	--	0.1	ug/L	Hladik and others, 2014
Dichloroiodomethane	594-04-7	OCRL	Disinfection by-product	GC-MS	MDL	--	0.05	ug/L	Hladik and others, 2014
Dichloronitromethane	7119-89-3	OCRL	Disinfection by-product	GC-MS	MDL	--	0.1	ug/L	Hladik and others, 2014
Tribromomethane	75-25-2	OCRL	Disinfection by-product	GC-MS	MDL	--	0.05	ug/L	Hladik and others, 2014
Tribromonitromethane	464-10-8	OCRL	Disinfection by-product	GC-MS	MDL	--	1	ug/L	Hladik and others, 2014
Trichloroacetonitrile	545-06-2	OCRL	Disinfection by-product	GC-MS	MDL	--	0.1	ug/L	Hladik and others, 2014
Trichloromethane	67-66-3	OCRL	Disinfection by-product	GC-MS	MDL	--	0.05	ug/L	Hladik and others, 2014
Triiodomethane	75-47-8	OCRL	Disinfection by-product	GC-MS	MDL	--	0.1	ug/L	Hladik and others, 2014
11-Chloroeicosafluoro-3-oxaundecane-1-sulfonate (11Cl-PF3OUDS)	--	NWQL	Per- and polyfluoroalkyl substance	Online SPE, LC-MS/MS	IRL	--	0.1-1.0	ng/L	Gray and others, 2025 and Faber and others, 2025
1H,1H,2H,2H-Perfluorodecane sulfonate (8:2 FTS)	39108-34-4	NWQL	Per- and polyfluoroalkyl substance	Online SPE, LC-MS/MS	IRL	--	0.1-.48	ng/L	Gray and others, 2025 and Faber and others, 2025
1H,1H,2H,2H-perfluorodecyl phosphate (8:2 PAP)	--	NWQL	Per- and polyfluoroalkyl substance	Online SPE, LC-MS/MS	IRL	--	18.5-23.8	ng/L	Gray and others, 2025 and Faber and others, 2025
1H,1H,2H,2H-Perfluorododecane sulfonate (10:2FTS)	--	NWQL	Per- and polyfluoroalkyl substance	Online SPE, LC-MS/MS	IRL	--	0.96-0.1	ng/L	Gray and others, 2025 and Faber and others, 2025
1H,1H,2H,2H-Perfluorohexane sulfonate (4:2FTS)	757124-72-4	NWQL	Per- and polyfluoroalkyl substance	Online SPE, LC-MS/MS	IRL	--	0.47-0.48	ng/L	Gray and others, 2025 and Faber and others, 2025
1H,1H,2H,2H-Perfluorooctane sulfonate (6:2FTS)	27619-97-2	NWQL	Per- and polyfluoroalkyl substance	Online SPE, LC-MS/MS	IRL	--	0.1-1.90	ng/L	Gray and others, 2025 and Faber and others, 2025
1H,1H,2H,2H-perfluorooctyl-1H,1H,2H,2H-perfluorodecylphosphate (6:2/8:2 diPAP)	--	NWQL	Per- and polyfluoroalkyl substance	Online SPE, LC-MS/MS	IRL	--	0.97-2.51	ng/L	Gray and others, 2025 and Faber and others, 2025
1H,1H-perfluorooctyl phosphate (6:2 PAP)	--	NWQL	Per- and polyfluoroalkyl substance	Online SPE, LC-MS/MS	IRL	--	9.08-23.4	ng/L	Gray and others, 2025 and Faber and others, 2025
2-(N-ethylperfluorooctane-1-sulfonamido)ethyl phosphate (SamPAP)	--	NWQL	Per- and polyfluoroalkyl substance	Online SPE, LC-MS/MS	IRL		12-48.2	ng/L	Gray and others, 2025 and Faber and others, 2025
2H-Perfluoro-2-decenoate (FOUEA)	--	NWQL	Per- and polyfluoroalkyl substance	Online SPE, LC-MS/MS	IRL	--	5.00-5.15	ng/L	Gray and others, 2025 and Faber and others, 2025
2H-Perfluoro-2-dodecenoate (FDUEA)	--	NWQL	Per- and polyfluoroalkyl substance	Online SPE, LC-MS/MS	IRL	--	2.6-10.3	ng/L	Gray and others, 2025 and Faber and others, 2025
2H-perfluoro-2-octenoate (FHUEA)	--	NWQL	Per- and polyfluoroalkyl substance	Online SPE, LC-MS/MS	IRL	--	0.1-1.03	ng/L	Gray and others, 2025 and Faber and others, 2025
3-Perfluoroheptyl propanoate (FHpPA)	--	NWQL	Per- and polyfluoroalkyl substance	Online SPE, LC-MS/MS	IRL	--	0.52-2.1	ng/L	Gray and others, 2025 and Faber and others, 2025
3-Perfluoropentyl propanoate (FPePA)	--	NWQL	Per- and polyfluoroalkyl substance	Online SPE, LC-MS/MS	IRL	--	20.0-258	ng/L	Gray and others, 2025 and Faber and others, 2025
3-Perfluoropropyl propanoate (FPrPA)	--	NWQL	Per- and polyfluoroalkyl substance	Online SPE, LC-MS/MS	IRL	--	1.03-20.0	ng/L	Gray and others, 2025 and Faber and others, 2025
4,8-dioxa-3H-perfluorononanoate (ADONA)	--	NWQL	Per- and polyfluoroalkyl substance	Online SPE, LC-MS/MS	IRL	--	0.095-0.1	ng/L	Gray and others, 2025 and Faber and others, 2025
9-Chlorohexadecafluoro-3-oxanonane-1-sulfonate (9Cl-PF3ONS)	--	NWQL	Per- and polyfluoroalkyl substance	Online SPE, LC-MS/MS	IRL	--	0.96-4.8	ng/L	Gray and others, 2025 and Faber and others, 2025
Bis(1H,1H,2H,2H-perfluorodecyl)phosphate (8:2 diPAP)	--	NWQL	Per- and polyfluoroalkyl substance	Online SPE, LC-MS/MS	IRL	--	0.51-1.01	ng/L	Gray and others, 2025 and Faber and others, 2025
Bis(1H,1H,2H,2H-perfluorooctyl)phosphate (6:2 diPAP)	--	NWQL	Per- and polyfluoroalkyl substance	Online SPE, LC-MS/MS	IRL	--	0.48-0.5	ng/L	Gray and others, 2025 and Faber and others, 2025
Bis(perfluorohexyl)phosphinate (6:6 PFPi)	--	NWQL	Per- and polyfluoroalkyl substance	Online SPE, LC-MS/MS	IRL	--	0.2-0.48	ng/L	Gray and others, 2025 and Faber and others, 2025
Bis-[2-(N-ethylperfluorooctane-1-sulfonamido)ethyl] phosphate (diSAmPAP)	--	NWQL	Per- and polyfluoroalkyl substance	Online SPE, LC-MS/MS	IRL	--	1.01-9.8	ng/L	Gray and others, 2025 and Faber and others, 2025
Perfluoro-2-propoxypropanoate (GenX [HFPO-DA])	122499-17-6	NWQL	Per- and polyfluoroalkyl substance	Online SPE, LC-MS/MS	IRL	--	0.500-2.06	ng/L	Gray and others, 2025 and Faber and others, 2025
N-ethyl perfluorooctanesulfonamidoacetate (N-EtFOSAA linear)	--	NWQL	Per- and polyfluoroalkyl substance	Online SPE, LC-MS/MS	IRL	--	0.4-0.780	ng/L	Gray and others, 2025 and Faber and others, 2025
N-Ethylperfluorooctane sulfonamide (N-EtFOSA-M)	4151-50-2	NWQL	Per- and polyfluoroalkyl substance	Online SPE, LC-MS/MS	IRL	--	1.03-5.00	ng/L	Gray and others, 2025 and Faber and others, 2025
N-methylperfluoro-1-butanesulfonamide (N-MeFBSA M)	--	NWQL	Per- and polyfluoroalkyl substance	Online SPE, LC-MS/MS	IRL	--	10.0-103	ng/L	Gray and others, 2025 and Faber and others, 2025
N-methylperfluorooctane sulfonamidoacetate (N-MeFOSAA linear)	--	NWQL	Per- and polyfluoroalkyl substance	Online SPE, LC-MS/MS	IRL	--	0.160-1.52	ng/L	Gray and others, 2025 and Faber and others, 2025
N-Methylperfluorooctanesulfonamide (N-MeFOSA M)	31506-32-8	NWQL	Per- and polyfluoroalkyl substance	Online SPE, LC-MS/MS	IRL	--	2.06-5.00	ng/L	Gray and others, 2025 and Faber and others, 2025
Perfluoro(2-ethoxyethane) sulfonate (PFEESA)	--	NWQL	Per- and polyfluoroalkyl substance	Online SPE, LC-MS/MS	IRL	--	1.78-9.17	ng/L	Gray and others, 2025 and Faber and others, 2025
Perfluoro-1-decanesulfonamide (FDSA)	--	NWQL	Per- and polyfluoroalkyl substance	Online SPE, LC-MS/MS	IRL	--	2.00-5.2	ng/L	Gray and others, 2025 and Faber and others, 2025
Perfluoro-1-heptanesulfonamide (FHpSA)	--	NWQL	Per- and polyfluoroalkyl substance	Online SPE, LC-MS/MS	IRL	--	5.00-10.3	ng/L	Gray and others, 2025 and Faber and others, 2025
Perfluoro-1-octanesulfonamidoacetate (FOSAA) (2022 only)	--	NWQL	Per- and polyfluoroalkyl substance	Online SPE, LC-MS/MS	IRL	--	2.58	ng/L	Gray and others, 2025 and Faber and others, 2025
Perfluoro-3,6-dioxaheptanoate (3,6-OPFHpA)	--	NWQL	Per- and polyfluoroalkyl substance	Online SPE, LC-MS/MS	IRL	--	5.00-10.3	ng/L	Gray and others, 2025 and Faber and others, 2025
Perfluoro-4-ethylcyclohexane sulfonate (PFECHS), cis and trans isomers	--	NWQL	Per- and polyfluoroalkyl substance	Online SPE, LC-MS/MS	IRL	--	0.19-0.37	ng/L	Gray and others, 2025 and Faber and others, 2025
Perfluoro-4-oxapentanoate (PF40PeA)	--	NWQL	Per- and polyfluoroalkyl substance	Online SPE, LC-MS/MS	IRL	--	0.200-1.03	ng/L	Gray and others, 2025 and Faber and others, 2025
Perfluoro-5-oxahexanoate (PF5OHxA)	--	NWQL	Per- and polyfluoroalkyl substance	Online SPE, LC-MS/MS	IRL	--	5.00-206	ng/L	Gray and others, 2025 and Faber and others, 2025
Perfluorobutane sulfonamido amin (PBSA)	--	NWQL	Per- and polyfluoroalkyl substance	Online SPE, LC-MS/MS	IRL	--	4.58-91.6	ng/L	Gray and others, 2025 and Faber and others, 2025
Perfluorobutane sulfonate (PFBS)	45187-15-3	NWQL	Per- and polyfluoroalkyl substance	Online SPE, LC-MS/MS	IRL	--	0.440-1.83	ng/L	Gray and others, 2025 and Faber and others, 2025
Perfluorobutanesulfonamide (FBSA)	30334-69-1	NWQL	Per- and polyfluoroalkyl substance	Online SPE, LC-MS/MS	IRL	--	2.06-10.3	ng/L	Gray and others, 2025 and Faber and others, 2025
Perfluorobutanoate (PFBA)	45048-62-2	NWQL	Per- and polyfluoroalkyl substance	Online SPE, LC-MS/MS	IRL	--	2.06-10.3	ng/L	Gray and others, 2025 and Faber and others, 2025
Perfluorodecane sulfonate (PFDS)	126105-34-8	NWQL	Per- and polyfluoroalkyl substance	Online SPE, LC-MS/MS	IRL	--	0.1-10.5	ng/L	Gray and others, 2025 and Faber and others, 2025
Perfluorodecanoate (PFDA)	73829-36-4	NWQL	Per- and polyfluoroalkyl substance	Online SPE, LC-MS/MS	IRL	--	0.1-0.5	ng/L	Gray and others, 2025 and Faber and others, 2025
Perfluorodecylphosphinate (PFDPA)	--	NWQL	Per- and polyfluoroalkyl substance	Online SPE, LC-MS/MS	IRL	--	2.58-10.3	ng/L	Gray and others, 2025 and Faber and others, 2025
Perfluorododecanoate (PFDoDA)	171978-95-3	NWQL	Per- and polyfluoroalkyl substance	Online SPE, LC-MS/MS	IRL	--	0.1-0.5	ng/L	Gray and others, 2025 and Faber and others, 2025
Perfluoroheptane sulfonate (PFHpS)	146689-46-5	NWQL	Per- and polyfluoroalkyl substance	Online SPE, LC-MS/MS	IRL	--	0.477-0.49	ng/L	Gray and others, 2025 and Faber and others, 2025
Perfluoroheptanoate (PFHpA)	120885-29-2	NWQL	Per- and polyfluoroalkyl substance	Online SPE, LC-MS/MS	IRL	--	0.1-0.52	ng/L	Gray and others, 2025 and Faber and others, 2025
Perfluorohexane sulfonate (branched) (PFHxS branched)	108427-53-8	NWQL	Per- and polyfluoroalkyl substance	Online SPE, LC-MS/MS	IRL	--	0.35-0.89	ng/L	Gray and others, 2025 and Faber and others, 2025
Perfluorohexane sulfonate (linear) (PFHxS linear)	108427-53-8	NWQL	Per- and polyfluoroalkyl substance	Online SPE, LC-MS/MS	IRL	--	0.370-0.76	ng/L	Gray and others, 2025 and Faber and others, 2025
Perfluorohexanesulfonamide (FHx-SA)	41997-13-1	NWQL	Per- and polyfluoroalkyl substance	Online SPE, LC-MS/MS	IRL	--	0.1-5.15	ng/L	Gray and others, 2025 and Faber and others, 2025
Perfluorohexanoate (PFHxA)	92612-52-7	NWQL	Per- and polyfluoroalkyl substance	Online SPE, LC-MS/MS	IRL	--	0.21-5.00	ng/L	Gray and others, 2025 and Faber and others, 2025
Perfluorohexylphosphinate (PFHxPA)	--	NWQL	Per- and polyfluoroalkyl substance	Online SPE, LC-MS/MS	IRL	--	0.5-1.03	ng/L	Gray and others, 2025 and Faber and others, 2025
Perfluorononane sulfonate (PFNS)	474511-07-4	NWQL	Per- and polyfluoroalkyl substance	Online SPE, LC-MS/MS	IRL	--	0.48-0.5	ng/L	Gray and others, 2025 and Faber and others, 2025
Perfluorononanoate (PFNA)	72007-68-2	NWQL	Per- and polyfluoroalkyl substance	Online SPE, LC-MS/MS	IRL	--	0.1-.072	ng/L	Gray and others, 2025 and Faber and others, 2025
Perfluorooctane sulfonamide (FOSA)	754-91-6	NWQL	Per- and polyfluoroalkyl substance	Online SPE, LC-MS/MS	IRL	--	0.52-1.03	ng/L	Gray and others, 2025 and Faber and others, 2025
Perfluorooctane sulfonate (branched) (PFOS branched)	45298-90-6	NWQL	Per- and polyfluoroalkyl substance	Online SPE, LC-MS/MS	IRL	--	0.41-1.01	ng/L	Gray and others, 2025 and Faber and others, 2025
Perfluorooctane sulfonate (linear) (PFOS linear)	45298-90-6	NWQL	Per- and polyfluoroalkyl substance	Online SPE, LC-MS/MS	IRL	--	0.15-0.38	ng/L	Gray and others, 2025 and Faber and others, 2025
Perfluorooctanoate (PFOA)	45285-51-6	NWQL	Per- and polyfluoroalkyl substance	Online SPE, LC-MS/MS	IRL	--	0.200-1.7	ng/L	Gray and others, 2025 and Faber and others, 2025
Perfluorooctylphosphonate (PFOPA)	--	NWQL	Per- and polyfluoroalkyl substance	Online SPE, LC-MS/MS	IRL	--	1.03-10.3	ng/L	Gray and others, 2025 and Faber and others, 2025
Perfluoropentane sulfonate (PFPeS)	175905-36-9	NWQL	Per- and polyfluoroalkyl substance	Online SPE, LC-MS/MS	IRL	--	0.47-0.97	ng/L	Gray and others, 2025 and Faber and others, 2025
Perfluoropentanoate (PFPeA)	45167-47-3	NWQL	Per- and polyfluoroalkyl substance	Online SPE, LC-MS/MS	IRL	--	1.03-10.3	ng/L	Gray and others, 2025 and Faber and others, 2025
Perfluorotetradecanoate (PFTeDA)	365971-87-5	NWQL	Per- and polyfluoroalkyl substance	Online SPE, LC-MS/MS	IRL	--	0.21-0.5	ng/L	Gray and others, 2025 and Faber and others, 2025
Perfluorotridecane sulfonate (PFTrDS)	--	NWQL	Per- and polyfluoroalkyl substance	Online SPE, LC-MS/MS	IRL	--	0.1-0.5	ng/L	Gray and others, 2025 and Faber and others, 2025
Perfluorotridecanoate (PFTrDA)	862374-87-6	NWQL	Per- and polyfluoroalkyl substance	Online SPE, LC-MS/MS	IRL	--	0.1-1.00	ng/L	Gray and others, 2025 and Faber and others, 2025
Perfluoroundecane sulfonate (PFUnDS)	--	NWQL	Per- and polyfluoroalkyl substance	Online SPE, LC-MS/MS	IRL	--	0.1-0.970	ng/L	Gray and others, 2025 and Faber and others, 2025
Perfluoroundecanoate (PFUnDA)	196859-54-8	NWQL	Per- and polyfluoroalkyl substance	Online SPE, LC-MS/MS	IRL	--	0.1-0.52	ng/L	Gray and others, 2025 and Faber and others, 2025
1-(3,4-Dichlorophenyl) urea (DCPU)	2327-02-8	OCRL	Pesticide	LC-MS/MS	MDL	--	1	ng/L	Gross and others, 2023
1-(3,4-Dichlorophenyl)-3-methyl urea (DCPMU)	3567-62-2	OCRL	Pesticide	LC-MS/MS	MDL	--	1	ng/L	Gross and others, 2023
2-Chloro-4-isopropylamino-6-amino-s-triazine (CIAT)	6190-65-4	OCRL	Pesticide	LC-MS/MS	MDL	--	1	ng/L	Gross and others, 2023
2-Chloro-6-ethylamino-4-amino-s-triazine (CEAT)	1007-28-9	OCRL	Pesticide	LC-MS/MS	MDL	--	1	ng/L	Gross and others, 2023
3,4-Dichloroaniline	95-76-1	OCRL	Pesticide	LC-MS/MS	MDL	--	1	ng/L	Gross and others, 2023
3,5-Dichloroaniline	626-43-7	OCRL	Pesticide	LC-MS/MS	MDL	--	2	ng/L	Gross and others, 2023
5-hydroxy-imidacloprid	380912-09-4	OCRL	Pesticide	LC-MS/MS	MDL	--	1	ng/L	Gross and others, 2023
Acetamiprid	135410-20-7	OCRL	Pesticide	LC-MS/MS	MDL	--	0.5	ng/L	Gross and others, 2023
Acetochlor	34256-82-1	OCRL	Pesticide	LC-MS/MS	MDL	--	1	ng/L	Gross and others, 2023
Acibenzolar-S-methyl	135158-54-2	OCRL	Pesticide	LC-MS/MS	MDL	--	2	ng/L	Gross and others, 2023
Allethrin	584-79-2	OCRL	Pesticide	LC-MS/MS	MDL	--	2	ng/L	Gross and others, 2023
Atrazine	1912-24-9	OCRL	Pesticide	LC-MS/MS	MDL	--	0.5	ng/L	Gross and others, 2023
Azoxystrobin	131860-33-8	OCRL	Pesticide	LC-MS/MS	MDL	--	0.5	ng/L	Gross and others, 2023
Benfluralin	1861-40-1	OCRL	Pesticide	LC-MS/MS	MDL	--	0.5	ng/L	Gross and others, 2023
Bentazon	25057-89-0	OCRL	Pesticide	LC-MS/MS	MDL	--	1	ng/L	Gross and others, 2023
Benzobicyclon	156963-66-5	OCRL	Pesticide	LC-MS/MS	MDL	--	1	ng/L	Gross and others, 2023
Benzovindiflupyr	1072957-71-1	OCRL	Pesticide	LC-MS/MS	MDL	--	0.5	ng/L	Gross and others, 2023
Bifenthrin	82657-04-3	OCRL	Pesticide	LC-MS/MS	MDL	--	0.5	ng/L	Gross and others, 2023
Boscalid	188425-85-6	OCRL	Pesticide	LC-MS/MS	MDL	--	1	ng/L	Gross and others, 2023
Boscalid M510F01	661463-87-2	OCRL	Pesticide	LC-MS/MS	MDL	--	0.5	ng/L	Gross and others, 2023
Broflanilide	1207727-04-5	OCRL	Pesticide	LC-MS/MS	MDL	--	0.5	ng/L	Gross and others, 2023
Bromoconazole	116255-48-2	OCRL	Pesticide	LC-MS/MS	MDL	--	1	ng/L	Gross and others, 2023
Butralin	33629-47-9	OCRL	Pesticide	LC-MS/MS	MDL	--	1	ng/L	Gross and others, 2023
Carbaryl	63-25-2	OCRL	Pesticide	LC-MS/MS	MDL	--	0.5	ng/L	Gross and others, 2023
Carbendazim	10605-21-7	OCRL	Pesticide	LC-MS/MS	MDL	--	0.5	ng/L	Gross and others, 2023
Carbofuran	1563-66-2	OCRL	Pesticide	LC-MS/MS	MDL	--	0.5	ng/L	Gross and others, 2023
Chlorantraniliprole	500008-45-7	OCRL	Pesticide	LC-MS/MS	MDL	--	0.5	ng/L	Gross and others, 2023
Chlorfenapyr	122453-73-0	OCRL	Pesticide	LC-MS/MS	MDL	--	2	ng/L	Gross and others, 2023
Chlorothalonil	1897-45-6	OCRL	Pesticide	LC-MS/MS	MDL	--	5	ng/L	Gross and others, 2023
Chlorpyrifos	2921-88-2	OCRL	Pesticide	LC-MS/MS	MDL	--	1	ng/L	Gross and others, 2023
Chlorpyrifos oxon	5598-15-2	OCRL	Pesticide	LC-MS/MS	MDL	--	0.5	ng/L	Gross and others, 2023
Clomazone	81777-89-1	OCRL	Pesticide	LC-MS/MS	MDL	--	0.5	ng/L	Gross and others, 2023
Clothianidin	210880-92-5	OCRL	Pesticide	LC-MS/MS	MDL	--	0.5	ng/L	Gross and others, 2023
Clothianidin desmethyl (TZNG)	135018-15-4	OCRL	Pesticide	LC-MS/MS	MDL	--	1	ng/L	Gross and others, 2023
Coumaphos	56-72-4	OCRL	Pesticide	LC-MS/MS	MDL	--	1	ng/L	Gross and others, 2023
Cyantraniliprole	736994-63-1	OCRL	Pesticide	LC-MS/MS	MDL	--	1	ng/L	Gross and others, 2023
Cyazofamid	120116-88-3	OCRL	Pesticide	LC-MS/MS	MDL	--	0.5	ng/L	Gross and others, 2023
Cyclaniliprole	1031756-98-5	OCRL	Pesticide	LC-MS/MS	MDL	--	1	ng/L	Gross and others, 2023
Cycloate	1134-23-2	OCRL	Pesticide	LC-MS/MS	MDL	--	1	ng/L	Gross and others, 2023
Cyfluthrin	68359-37-5	OCRL	Pesticide	LC-MS/MS	MDL	--	0.5	ng/L	Gross and others, 2023
Cyhalofop-butyl	122008-85-9	OCRL	Pesticide	LC-MS/MS	MDL	--	0.5	ng/L	Gross and others, 2023
Cyhalothrin (all isomers)	68085-85-8	OCRL	Pesticide	LC-MS/MS	MDL	--	0.5	ng/L	Gross and others, 2023
Cymoxanil	57966-95-7	OCRL	Pesticide	LC-MS/MS	MDL	--	1	ng/L	Gross and others, 2023
Cypermethrin	52315-07-8	OCRL	Pesticide	LC-MS/MS	MDL	--	0.5	ng/L	Gross and others, 2023
Cyproconazole	94361-06-5	OCRL	Pesticide	LC-MS/MS	MDL	--	0.5	ng/L	Gross and others, 2023
Cyprodinil	121552-61-2	OCRL	Pesticide	LC-MS/MS	MDL	--	0.5	ng/L	Gross and others, 2023
Deltamethrin	52918-63-5	OCRL	Pesticide	LC-MS/MS	MDL	--	1	ng/L	Gross and others, 2023
Desthio-prothioconazole	120983-64-4	OCRL	Pesticide	LC-MS/MS	MDL	--	0.5	ng/L	Gross and others, 2023
Desulfinylfipronil	205650-65-3	OCRL	Pesticide	LC-MS/MS	MDL	--	0.5	ng/L	Gross and others, 2023
Desulfinylfipronil amide	1115248-09-3	OCRL	Pesticide	LC-MS/MS	MDL	--	1	ng/L	Gross and others, 2023
Diazinon	333-41-5	OCRL	Pesticide	LC-MS/MS	MDL	--	0.5	ng/L	Gross and others, 2023
Diazoxon	962-58-3	OCRL	Pesticide	LC-MS/MS	MDL	--	0.5	ng/L	Gross and others, 2023
Dichlorvos	62-73-7	OCRL	Pesticide	LC-MS/MS	MDL	--	1	ng/L	Gross and others, 2023
Difenoconazole	119446-68-3	OCRL	Pesticide	LC-MS/MS	MDL	--	1	ng/L	Gross and others, 2023
Dimethomorph	110488-70-5	OCRL	Pesticide	LC-MS/MS	MDL	--	0.5	ng/L	Gross and others, 2023
Dimethyl tetrachloroterephthalate (DCPA)	1861-32-1	OCRL	Pesticide	LC-MS/MS	MDL	--	0.5	ng/L	Gross and others, 2023
Dinotefuran	165252-70-0	OCRL	Pesticide	LC-MS/MS	MDL	--	1	ng/L	Gross and others, 2023
Dithiopyr	97886-45-8	OCRL	Pesticide	LC-MS/MS	MDL	--	0.5	ng/L	Gross and others, 2023
Diuron	330-54-1	OCRL	Pesticide	LC-MS/MS	MDL	--	0.5	ng/L	Gross and others, 2023
Esfenvalerate	66230-04-4	OCRL	Pesticide	LC-MS/MS	MDL	--	0.5	ng/L	Gross and others, 2023
Ethaboxam	162650-77-3	OCRL	Pesticide	LC-MS/MS	MDL	--	1	ng/L	Gross and others, 2023
Ethalfluralin	55283-68-6	OCRL	Pesticide	LC-MS/MS	MDL	--	0.5	ng/L	Gross and others, 2023
Etofenprox	80844-07-1	OCRL	Pesticide	LC-MS/MS	MDL	--	0.5	ng/L	Gross and others, 2023
Etoxazole	153233-91-1	OCRL	Pesticide	LC-MS/MS	MDL	--	0.5	ng/L	Gross and others, 2023
Famoxadone	131807-57-3	OCRL	Pesticide	LC-MS/MS	MDL	--	10	ng/L	Gross and others, 2023
Fenamidone	161326-34-7	OCRL	Pesticide	LC-MS/MS	MDL	--	0.5	ng/L	Gross and others, 2023
Fenbuconazole	114369-43-6	OCRL	Pesticide	LC-MS/MS	MDL	--	0.5	ng/L	Gross and others, 2023
Fenhexamid	126833-17-8	OCRL	Pesticide	LC-MS/MS	MDL	--	10	ng/L	Gross and others, 2023
Fenpropathrin	39515-41-8	OCRL	Pesticide	LC-MS/MS	MDL	--	1	ng/L	Gross and others, 2023
Fenpyroximate	134098-61-6	OCRL	Pesticide	LC-MS/MS	MDL	--	0.5	ng/L	Gross and others, 2023
Fipronil	120068-37-3	OCRL	Pesticide	LC-MS/MS	MDL	--	0.5	ng/L	Gross and others, 2023
Fipronil sulfide	120067-83-6	OCRL	Pesticide	LC-MS/MS	MDL	--	0.5	ng/L	Gross and others, 2023
Fipronil sulfone	120068-36-2	OCRL	Pesticide	LC-MS/MS	MDL	--	0.5	ng/L	Gross and others, 2023
Flonicamid	158062-67-0	OCRL	Pesticide	LC-MS/MS	MDL	--	1	ng/L	Gross and others, 2023
Florpyrauxifen-benzyl	1390661-72-9	OCRL	Pesticide	LC-MS/MS	MDL	--	0.5	ng/L	Gross and others, 2023
Fluazinam	79622-59-6	OCRL	Pesticide	LC-MS/MS	MDL	--	0.5	ng/L	Gross and others, 2023
Flubendiamide	272451-65-7	OCRL	Pesticide	LC-MS/MS	MDL	--	1	ng/L	Gross and others, 2023
Fludioxonil	131341-86-1	OCRL	Pesticide	LC-MS/MS	MDL	--	1	ng/L	Gross and others, 2023
Flufenacet	142459-58-3	OCRL	Pesticide	LC-MS/MS	MDL	--	0.5	ng/L	Gross and others, 2023
Fluindapyr	1383809-87-7	OCRL	Pesticide	LC-MS/MS	MDL	--	0.5	ng/L	Gross and others, 2023
Flumetralin	62924-70-3	OCRL	Pesticide	LC-MS/MS	MDL	--	1	ng/L	Gross and others, 2023
Fluopicolide	239110-15-7	OCRL	Pesticide	LC-MS/MS	MDL	--	0.5	ng/L	Gross and others, 2023
Fluopyram	658066-35-4	OCRL	Pesticide	LC-MS/MS	MDL	--	0.5	ng/L	Gross and others, 2023
Fluoxastrobin	193740-76-0	OCRL	Pesticide	LC-MS/MS	MDL	--	0.5	ng/L	Gross and others, 2023
Flupyradifurone	951659-40-8	OCRL	Pesticide	LC-MS/MS	MDL	--	0.5	ng/L	Gross and others, 2023
Fluridone	59756-60-4	OCRL	Pesticide	LC-MS/MS	MDL	--	0.5	ng/L	Gross and others, 2023
Flutolanil	66332-96-5	OCRL	Pesticide	LC-MS/MS	MDL	--	0.5	ng/L	Gross and others, 2023
Flutriafol	76674-21-0	OCRL	Pesticide	LC-MS/MS	MDL	--	0.5	ng/L	Gross and others, 2023
Fluxapyroxad	907204-31-3	OCRL	Pesticide	LC-MS/MS	MDL	--	0.5	ng/L	Gross and others, 2023
Fomesafen	72178-02-0	OCRL	Pesticide	LC-MS/MS	MDL	--	2	ng/L	Gross and others, 2023
Glyphosate immunoassay	1071-83-6	OCRL	Pesticide	ELISA	--	--	0.075	ug/L	Gold Standard Diagnostics Horsham, Inc, 2020
Halauxifen-methyl	943831-98-9	OCRL	Pesticide	LC-MS/MS	MDL	--	0.5	ng/L	Gross and others, 2023
Hexazinone	51235-04-2	OCRL	Pesticide	LC-MS/MS	MDL	--	0.5	ng/L	Gross and others, 2023
Imazalil	35554-44-0	OCRL	Pesticide	LC-MS/MS	MDL	--	0.5	ng/L	Gross and others, 2023
Imidacloprid	138261-41-3	OCRL	Pesticide	LC-MS/MS	MDL	--	0.5	ng/L	Gross and others, 2023
Imidacloprid desnitro	115970-17-7	OCRL	Pesticide	LC-MS/MS	MDL	--	1	ng/L	Gross and others, 2023
Imidacloprid urea	120868-66-8	OCRL	Pesticide	LC-MS/MS	MDL	--	0.5	ng/L	Gross and others, 2023
Imidacloprid-olefin	115086-54-9	OCRL	Pesticide	LC-MS/MS	MDL	--	1	ng/L	Gross and others, 2023
Indaziflam	950782-86-2	OCRL	Pesticide	LC-MS/MS	MDL	--	0.5	ng/L	Gross and others, 2023
Indoxacarb	173584-44-6	OCRL	Pesticide	LC-MS/MS	MDL	--	1	ng/L	Gross and others, 2023
Ipconazole	125225-28-7	OCRL	Pesticide	LC-MS/MS	MDL	--	0.5	ng/L	Gross and others, 2023
Iprodione	36734-19-7	OCRL	Pesticide	LC-MS/MS	MDL	--	1	ng/L	Gross and others, 2023
Isofetamid	875915-78-9	OCRL	Pesticide	LC-MS/MS	MDL	--	0.5	ng/L	Gross and others, 2023
Kresoxim-methyl	143390-89-0	OCRL	Pesticide	LC-MS/MS	MDL	--	0.5	ng/L	Gross and others, 2023
Malaoxon	1634-78-2	OCRL	Pesticide	LC-MS/MS	MDL	--	0.5	ng/L	Gross and others, 2023
Malathion	121-75-5	OCRL	Pesticide	LC-MS/MS	MDL	--	0.5	ng/L	Gross and others, 2023
Mandestrobin	173662-97-0	OCRL	Pesticide	LC-MS/MS	MDL	--	0.5	ng/L	Gross and others, 2023
Mandipropamid	374726-62-2	OCRL	Pesticide	LC-MS/MS	MDL	--	0.5	ng/L	Gross and others, 2023
Metalaxyl	57837-19-1	OCRL	Pesticide	LC-MS/MS	MDL	--	0.5	ng/L	Gross and others, 2023
Metalaxyl CGA 94689	--	OCRL	Pesticide	LC-MS/MS	MDL	--	0.5	ng/L	Gross and others, 2023
Metconazole	125116-23-6	OCRL	Pesticide	LC-MS/MS	MDL	--	0.5	ng/L	Gross and others, 2023
Methoprene	40596-69-8	OCRL	Pesticide	LC-MS/MS	MDL	--	2	ng/L	Gross and others, 2023
Methoxyfenozide	161050-58-4	OCRL	Pesticide	LC-MS/MS	MDL	--	0.5	ng/L	Gross and others, 2023
Methyl parathion	298-00-0	OCRL	Pesticide	LC-MS/MS	MDL	--	1	ng/L	Gross and others, 2023
Metolachlor	51218-45-2	OCRL	Pesticide	LC-MS/MS	MDL	--	0.5	ng/L	Gross and others, 2023
Myclobutanil	88671-89-0	OCRL	Pesticide	LC-MS/MS	MDL	--	0.5	ng/L	Gross and others, 2023
Naled	300-76-5	OCRL	Pesticide	LC-MS/MS	MDL	--	10	ng/L	Gross and others, 2023
Napropamide	15299-99-7	OCRL	Pesticide	LC-MS/MS	MDL	--	0.5	ng/L	Gross and others, 2023
Nitrapyrin	1929-82-4	OCRL	Pesticide	LC-MS/MS	MDL	--	0.5	ng/L	Gross and others, 2023
Novaluron	116714-46-6	OCRL	Pesticide	LC-MS/MS	MDL	--	2	ng/L	Gross and others, 2023
Oryzalin	19044-88-3	OCRL	Pesticide	LC-MS/MS	MDL	--	2	ng/L	Gross and others, 2023
Oxadiazon	19666-30-9	OCRL	Pesticide	LC-MS/MS	MDL	--	1	ng/L	Gross and others, 2023
Oxathiapiprolin	1003318-67-9	OCRL	Pesticide	LC-MS/MS	MDL	--	0.5	ng/L	Gross and others, 2023
Oxyfluorfen	42874-03-3	OCRL	Pesticide	LC-MS/MS	MDL	--	1	ng/L	Gross and others, 2023
p,p'-DDD	72-54-8	OCRL	Pesticide	LC-MS/MS	MDL	--	0.5	ng/L	Gross and others, 2023
p,p'-DDE	72-55-9	OCRL	Pesticide	LC-MS/MS	MDL	--	0.5	ng/L	Gross and others, 2023
p,p'-DDT	50-29-3	OCRL	Pesticide	LC-MS/MS	MDL	--	0.5	ng/L	Gross and others, 2023
Paclobutrazol	76738-62-0	OCRL	Pesticide	LC-MS/MS	MDL	--	1	ng/L	Gross and others, 2023
Pendimethalin	40487-42-1	OCRL	Pesticide	LC-MS/MS	MDL	--	1	ng/L	Gross and others, 2023
Penoxsulam	219714-96-2	OCRL	Pesticide	LC-MS/MS	MDL	--	1	ng/L	Gross and others, 2023
Pentachloroanisole	1825-21-4	OCRL	Pesticide	LC-MS/MS	MDL	--	1	ng/L	Gross and others, 2023
Pentachloronitrobenzene	82-68-8	OCRL	Pesticide	LC-MS/MS	MDL	--	1	ng/L	Gross and others, 2023
Penthiopyrad	183675-82-3	OCRL	Pesticide	LC-MS/MS	MDL	--	0.5	ng/L	Gross and others, 2023
Permethrin	52645-53-1	OCRL	Pesticide	LC-MS/MS	MDL	--	1	ng/L	Gross and others, 2023
Phenothrin	26002-80-2	OCRL	Pesticide	LC-MS/MS	MDL	--	2	ng/L	Gross and others, 2023
Phosmet	732-11-6	OCRL	Pesticide	LC-MS/MS	MDL	--	0.5	ng/L	Gross and others, 2023
Picarbutrazox	500207-04-5	OCRL	Pesticide	LC-MS/MS	MDL	--	0.5	ng/L	Gross and others, 2023
Picoxystrobin	117428-22-5	OCRL	Pesticide	LC-MS/MS	MDL	--	0.5	ng/L	Gross and others, 2023
Piperonyl butoxide	51-03-6	OCRL	Pesticide	LC-MS/MS	MDL	--	0.5	ng/L	Gross and others, 2023
Prodiamine	29091-21-2	OCRL	Pesticide	LC-MS/MS	MDL	--	2	ng/L	Gross and others, 2023
Prometon	1610-18-0	OCRL	Pesticide	LC-MS/MS	MDL	--	0.5	ng/L	Gross and others, 2023
Prometryn	7287-19-6	OCRL	Pesticide	LC-MS/MS	MDL	--	0.5	ng/L	Gross and others, 2023
Propanil	709-98-8	OCRL	Pesticide	LC-MS/MS	MDL	--	1	ng/L	Gross and others, 2023
Propargite	2312-35-8	OCRL	Pesticide	LC-MS/MS	MDL	--	0.5	ng/L	Gross and others, 2023
Propiconazole	60207-90-1	OCRL	Pesticide	LC-MS/MS	MDL	--	0.5	ng/L	Gross and others, 2023
Propyzamide	23950-58-5	OCRL	Pesticide	LC-MS/MS	MDL	--	1	ng/L	Gross and others, 2023
Pydiflumetofen	1228284-64-7	OCRL	Pesticide	LC-MS/MS	MDL	--	0.5	ng/L	Gross and others, 2023
Pyraclostrobin	175013-18-0	OCRL	Pesticide	LC-MS/MS	MDL	--	0.5	ng/L	Gross and others, 2023
Pyridaben	96489-71-3	OCRL	Pesticide	LC-MS/MS	MDL	--	0.5	ng/L	Gross and others, 2023
Pyrimethanil	53112-28-0	OCRL	Pesticide	LC-MS/MS	MDL	--	0.5	ng/L	Gross and others, 2023
Pyriproxyfen	95737-68-1	OCRL	Pesticide	LC-MS/MS	MDL	--	0.5	ng/L	Gross and others, 2023
Quinoxyfen	124495-18-7	OCRL	Pesticide	LC-MS/MS	MDL	--	0.5	ng/L	Gross and others, 2023
Resmethrin	10453-86-8	OCRL	Pesticide	LC-MS/MS	MDL	--	2	ng/L	Gross and others, 2023
Sedaxane	874967-67-6	OCRL	Pesticide	LC-MS/MS	MDL	--	0.5	ng/L	Gross and others, 2023
S-Ethyl-N,N-dipropylthiocarbamate (EPTC)	759-94-4	OCRL	Pesticide	LC-MS/MS	MDL	--	2	ng/L	Gross and others, 2023
Simazine	122-34-9	OCRL	Pesticide	LC-MS/MS	MDL	--	1	ng/L	Gross and others, 2023
Sulfoxaflor	946578-00-3	OCRL	Pesticide	LC-MS/MS	MDL	--	1	ng/L	Gross and others, 2023
tau-Fluvalinate	102851-06-9	OCRL	Pesticide	LC-MS/MS	MDL	--	0.5	ng/L	Gross and others, 2023
Tebuconazole	107534-96-3	OCRL	Pesticide	LC-MS/MS	MDL	--	0.5	ng/L	Gross and others, 2023
Tebuconazole t-Butyl-OH	212267-64-6	OCRL	Pesticide	LC-MS/MS	MDL	--	0.5	ng/L	Gross and others, 2023
Tebufenozide	112410-23-8	OCRL	Pesticide	LC-MS/MS	MDL	--	0.5	ng/L	Gross and others, 2023
Tebupirimfos	96182-53-5	OCRL	Pesticide	LC-MS/MS	MDL	--	0.5	ng/L	Gross and others, 2023
Tebupirimfos oxon	1035330-36-9	OCRL	Pesticide	LC-MS/MS	MDL	--	0.5	ng/L	Gross and others, 2023
Tefluthrin	79538-32-2	OCRL	Pesticide	LC-MS/MS	MDL	--	0.5	ng/L	Gross and others, 2023
Tetraconazole	112281-77-3	OCRL	Pesticide	LC-MS/MS	MDL	--	0.5	ng/L	Gross and others, 2023
Tetramethrin	7696-12-0	OCRL	Pesticide	LC-MS/MS	MDL	--	1	ng/L	Gross and others, 2023
Thiabendazole	148-79-8	OCRL	Pesticide	LC-MS/MS	MDL	--	0.5	ng/L	Gross and others, 2023
Thiacloprid	111988-49-9	OCRL	Pesticide	LC-MS/MS	MDL	--	0.5	ng/L	Gross and others, 2023
Thiamethoxam	153719-23-4	OCRL	Pesticide	LC-MS/MS	MDL	--	0.5	ng/L	Gross and others, 2023
Thiamethoxam CGA-355190	902493-06-5	OCRL	Pesticide	LC-MS/MS	MDL	--	0.5	ng/L	Gross and others, 2023
Thiamethoxam NOA-407475	--	OCRL	Pesticide	LC-MS/MS	MDL	--	1	ng/L	Gross and others, 2023
Thiobencarb	28249-77-6	OCRL	Pesticide	LC-MS/MS	MDL	--	0.5	ng/L	Gross and others, 2023
Tolfenpyrad	129558-76-5	OCRL	Pesticide	LC-MS/MS	MDL	--	0.5	ng/L	Gross and others, 2023
Triadimefon	43121-43-3	OCRL	Pesticide	LC-MS/MS	MDL	--	1	ng/L	Gross and others, 2023
Triadimenol	55219-65-3	OCRL	Pesticide	LC-MS/MS	MDL	--	1	ng/L	Gross and others, 2023
Triallate	2303-17-5	OCRL	Pesticide	LC-MS/MS	MDL	--	2	ng/L	Gross and others, 2023
Tribufos	78-48-8	OCRL	Pesticide	LC-MS/MS	MDL	--	0.5	ng/L	Gross and others, 2023
Tricyclazole	41814-78-2	OCRL	Pesticide	LC-MS/MS	MDL	--	0.5	ng/L	Gross and others, 2023
Trifloxystrobin	141517-21-7	OCRL	Pesticide	LC-MS/MS	MDL	--	0.5	ng/L	Gross and others, 2023
Triflumizole	68694-11-1	OCRL	Pesticide	LC-MS/MS	MDL	--	0.5	ng/L	Gross and others, 2023
Trifluralin	1582-09-8	OCRL	Pesticide	LC-MS/MS	MDL	--	0.5	ng/L	Gross and others, 2023
Triticonazole	131983-72-7	OCRL	Pesticide	LC-MS/MS	MDL	--	0.5	ng/L	Gross and others, 2023
Valifenalate	283159-90-0	OCRL	Pesticide	LC-MS/MS	MDL	--	0.5	ng/L	Gross and others, 2023
Vinclozolin	50471-44-8	OCRL	Pesticide	LC-MS/MS	MDL	--	0.5	ng/L	Gross and others, 2023
Zoxamide	156052-68-5	OCRL	Pesticide	LC-MS/MS	MDL	--	1	ng/L	Gross and others, 2023
1,7-Dimethylxanthine	611-59-6	NWQL	Pharmaceutical	LC-MS/MS	RLDQC	21	88	ng/L	Furlong and others, 2014
10-Hydroxy-amitriptyline	64520-05-4	NWQL	Pharmaceutical	LC-MS/MS	RLDQC	1.7	8.3	ng/L	Furlong and others, 2014
Abacavir	136470-78-5	NWQL	Pharmaceutical	LC-MS/MS	RLDQC	1	2	ng/L	Furlong and others, 2014
Acetaminophen	103-90-2	NWQL	Pharmaceutical	LC-MS/MS	RLDQC	42	84	ng/L	Furlong and others, 2014
Acyclovir	59277-89-3	NWQL	Pharmaceutical	LC-MS/MS	RLDQC	4.4	22	ng/L	Furlong and others, 2014
Albuterol	18559-94-9	NWQL	Pharmaceutical	LC-MS/MS	RLDQC	1.2	6.7	ng/L	Furlong and others, 2014
Alprazolam	28981-97-7	NWQL	Pharmaceutical	LC-MS/MS	RLDQC	6.6	21	ng/L	Furlong and others, 2014
Amitriptyline	50-48-6	NWQL	Pharmaceutical	LC-MS/MS	RLDQC	19	37	ng/L	Furlong and others, 2014
Amphetamine	300-62-9	NWQL	Pharmaceutical	LC-MS/MS	RLDQC	1.1	4.4	ng/L	Furlong and others, 2014
Antipyrine	60-80-0	NWQL	Pharmaceutical	LC-MS/MS	RLDQC	25	50	ng/L	Furlong and others, 2014
Atenolol	29122-68-7	NWQL	Pharmaceutical	LC-MS/MS	RLDQC	4.8	13	ng/L	Furlong and others, 2014
Benztropine	86-13-5	NWQL	Pharmaceutical	LC-MS/MS	RLDQC	22	44	ng/L	Furlong and others, 2014
Betamethasone	378-44-9	NWQL	Pharmaceutical	LC-MS/MS	RLDQC	57	114	ng/L	Furlong and others, 2014
Bupropion	34911-55-2	NWQL	Pharmaceutical	LC-MS/MS	RLDQC	3.6	18	ng/L	Furlong and others, 2014
Caffeine	58-08-2	NWQL	Pharmaceutical	LC-MS/MS	RLDQC	43	91	ng/L	Furlong and others, 2014
Carbamazepine	298-46-4	NWQL	Pharmaceutical	LC-MS/MS	RLDQC	2.2	11	ng/L	Furlong and others, 2014
Carisoprodol	78-44-4	NWQL	Pharmaceutical	LC-MS/MS	RLDQC	6	20	ng/L	Furlong and others, 2014
Chlorpheniramine	132-22-9	NWQL	Pharmaceutical	LC-MS/MS	RLDQC	27	54	ng/L	Furlong and others, 2014
Cimetidine	51481-61-9	NWQL	Pharmaceutical	LC-MS/MS	RLDQC	60	140	ng/L	Furlong and others, 2014
Citalopram	59729-33-8	NWQL	Pharmaceutical	LC-MS/MS	RLDQC	3.3	6.6	ng/L	Furlong and others, 2014
Clonidine	4205-90-7	NWQL	Pharmaceutical	LC-MS/MS	RLDQC	30	61	ng/L	Furlong and others, 2014
Codeine	76-57-3	NWQL	Pharmaceutical	LC-MS/MS	RLDQC	16	32	ng/L	Furlong and others, 2014
Cotinine	486-56-6	NWQL	Pharmaceutical	LC-MS/MS	RLDQC	1.7	6.4	ng/L	Furlong and others, 2014
Dehydronifedipine	67035-22-7	NWQL	Pharmaceutical	LC-MS/MS	RLDQC	4	20	ng/L	Furlong and others, 2014
Desvenlafaxine	93413-62-8	NWQL	Pharmaceutical	LC-MS/MS	RLDQC	42	84	ng/L	Furlong and others, 2014
Dextromethorphan	125-71-3	NWQL	Pharmaceutical	LC-MS/MS	RLDQC	1.6	8.2	ng/L	Furlong and others, 2014
Diazepam	439-14-5	NWQL	Pharmaceutical	LC-MS/MS	RLDQC	2	4	ng/L	Furlong and others, 2014
Diltiazem	42399-41-7	NWQL	Pharmaceutical	LC-MS/MS	RLDQC	5.1	10	ng/L	Furlong and others, 2014
Diphenhydramine	147-24-0	NWQL	Pharmaceutical	LC-MS/MS	RLDQC	24	48	ng/L	Furlong and others, 2014
Duloxetine	116539-59-4	NWQL	Pharmaceutical	LC-MS/MS	RLDQC	7.3	37	ng/L	Furlong and others, 2014
Erythromycin	114-07-8	NWQL	Pharmaceutical	LC-MS/MS	RLDQC	27	80	ng/L	Furlong and others, 2014
Ezetimibe	163222-33-1	NWQL	Pharmaceutical	LC-MS/MS	RLDQC	80	205	ng/L	Furlong and others, 2014
Fadrozole	102676-47-1	NWQL	Pharmaceutical	LC-MS/MS	RLDQC	6.3	13	ng/L	Furlong and others, 2014
Famotidine	76824-35-6	NWQL	Pharmaceutical	LC-MS/MS	RLDQC	17	34	ng/L	Furlong and others, 2014
Fenofibrate	49562-28-9	NWQL	Pharmaceutical	LC-MS/MS	RLDQC	3.2	6.4	ng/L	Furlong and others, 2014
Fexofenadine	83799-24-0	NWQL	Pharmaceutical	LC-MS/MS	RLDQC	22	44	ng/L	Furlong and others, 2014
Fluconazole	86386-73-4	NWQL	Pharmaceutical	LC-MS/MS	RLDQC	15	30	ng/L	Furlong and others, 2014
Fluoxetine	54910-89-3	NWQL	Pharmaceutical	LC-MS/MS	RLDQC	13	26	ng/L	Furlong and others, 2014
Fluticasone propionate	80474-14-2	NWQL	Pharmaceutical	LC-MS/MS	RLDQC	10	30	ng/L	Furlong and others, 2014
Fluvoxamine	54739-18-3	NWQL	Pharmaceutical	LC-MS/MS	RLDQC	27	80	ng/L	Furlong and others, 2014
Glipizide	29094-61-9	NWQL	Pharmaceutical	LC-MS/MS	RLDQC	16	80	ng/L	Furlong and others, 2014
Glyburide	10238-21-8	NWQL	Pharmaceutical	LC-MS/MS	RLDQC	2	4	ng/L	Furlong and others, 2014
Hydrocodone	125-29-1	NWQL	Pharmaceutical	LC-MS/MS	RLDQC	20	40	ng/L	Furlong and others, 2014
Hydrocortisone	50-23-7	NWQL	Pharmaceutical	LC-MS/MS	RLDQC	73	147	ng/L	Furlong and others, 2014
Hydroxyzine	68-88-2	NWQL	Pharmaceutical	LC-MS/MS	RLDQC	1.5	7.4	ng/L	Furlong and others, 2014
Iminostilbene	256-96-2	NWQL	Pharmaceutical	LC-MS/MS	RLDQC	73	145	ng/L	Furlong and others, 2014
Ketoconazole	65277-42-1	NWQL	Pharmaceutical	LC-MS/MS	RLDQC	56	113	ng/L	Furlong and others, 2014
Lamivudine	134678-17-4	NWQL	Pharmaceutical	LC-MS/MS	RLDQC	3.2	16	ng/L	Furlong and others, 2014
Lidocaine	137-58-6	NWQL	Pharmaceutical	LC-MS/MS	RLDQC	2	4	ng/L	Furlong and others, 2014
Loperamide	53179-11-6	NWQL	Pharmaceutical	LC-MS/MS	RLDQC	40	80	ng/L	Furlong and others, 2014
Loratadine	79794-75-5	NWQL	Pharmaceutical	LC-MS/MS	RLDQC	1.4	7	ng/L	Furlong and others, 2014
Lorazepam	846-49-1	NWQL	Pharmaceutical	LC-MS/MS	RLDQC	101	202	ng/L	Furlong and others, 2014
Meprobamate	57-53-4	NWQL	Pharmaceutical	LC-MS/MS	RLDQC	6	12	ng/L	Furlong and others, 2014
Metaxalone	1665-48-1	NWQL	Pharmaceutical	LC-MS/MS	RLDQC	7.8	16	ng/L	Furlong and others, 2014
Metformin	657-24-9	NWQL	Pharmaceutical	LC-MS/MS	RLDQC	6.6	13	ng/L	Furlong and others, 2014
Methadone	76-99-3	NWQL	Pharmaceutical	LC-MS/MS	RLDQC	3.8	7.6	ng/L	Furlong and others, 2014
Methocarbamol	532-03-6	NWQL	Pharmaceutical	LC-MS/MS	RLDQC	5.6	11	ng/L	Furlong and others, 2014
Methotrexate	59-05-2	NWQL	Pharmaceutical	LC-MS/MS	RLDQC	26	52	ng/L	Furlong and others, 2014
Methyl-1H-benzotriazole	29385-43-1	NWQL	Pharmaceutical	LC-MS/MS	RLDQC	28	80	ng/L	Furlong and others, 2014
Metoprolol	51384-51-1	NWQL	Pharmaceutical	LC-MS/MS	RLDQC	5	10	ng/L	Furlong and others, 2014
Morphine	57-27-2	NWQL	Pharmaceutical	LC-MS/MS	RLDQC	20	80	ng/L	Furlong and others, 2014
Nadolol	42200-33-9	NWQL	Pharmaceutical	LC-MS/MS	RLDQC	4	20	ng/L	Furlong and others, 2014
N-Desmethyldiltiazem	--	NWQL	Pharmaceutical	LC-MS/MS	RLDQC	35	70	ng/L	Furlong and others, 2014
Nevirapine	129618-40-2	NWQL	Pharmaceutical	LC-MS/MS	RLDQC	23	46	ng/L	Furlong and others, 2014
Nicotine	54-11-5	NWQL	Pharmaceutical	LC-MS/MS	RLDQC	29	58	ng/L	Furlong and others, 2014
Nizatidine	76963-41-2	NWQL	Pharmaceutical	LC-MS/MS	RLDQC	40	80	ng/L	Furlong and others, 2014
Nordiazepam	1088-11-5	NWQL	Pharmaceutical	LC-MS/MS	RLDQC	10	20	ng/L	Furlong and others, 2014
Norethindrone	68-22-4	NWQL	Pharmaceutical	LC-MS/MS	RLDQC	10	20	ng/L	Furlong and others, 2014
Norfluoxetine	56161-73-0	NWQL	Pharmaceutical	LC-MS/MS	RLDQC	40	80	ng/L	Furlong and others, 2014
Norsertraline	87857-41-8	NWQL	Pharmaceutical	LC-MS/MS	RLDQC	40	80	ng/L	Furlong and others, 2014
Norverapamil	67018-85-3	NWQL	Pharmaceutical	LC-MS/MS	RLDQC	4.3	8.6	ng/L	Furlong and others, 2014
Omeprazole + Esomprazole	--	NWQL	Pharmaceutical	LC-MS/MS	RLDQC	8.2	16	ng/L	Furlong and others, 2014
Oseltamivir	196618-13-0	NWQL	Pharmaceutical	LC-MS/MS	RLDQC	2.9	15	ng/L	Furlong and others, 2014
Oxazepam	604-75-1	NWQL	Pharmaceutical	LC-MS/MS	RLDQC	113	226	ng/L	Furlong and others, 2014
Oxycodone	76-42-6	NWQL	Pharmaceutical	LC-MS/MS	RLDQC	5	25	ng/L	Furlong and others, 2014
Paroxetine	61869-08-7	NWQL	Pharmaceutical	LC-MS/MS	RLDQC	36	72	ng/L	Furlong and others, 2014
Penciclovir	39809-25-1	NWQL	Pharmaceutical	LC-MS/MS	RLDQC	40	80	ng/L	Furlong and others, 2014
Pentoxifylline	6493-05-6	NWQL	Pharmaceutical	LC-MS/MS	RLDQC	4.7	9.4	ng/L	Furlong and others, 2014
Phenazopyridine	94-78-0	NWQL	Pharmaceutical	LC-MS/MS	RLDQC	4.1	13	ng/L	Furlong and others, 2014
Phendimetrazine	634-03-7	NWQL	Pharmaceutical	LC-MS/MS	RLDQC	5	20	ng/L	Furlong and others, 2014
Phenytoin	57-41-0	NWQL	Pharmaceutical	LC-MS/MS	RLDQC	94	188	ng/L	Furlong and others, 2014
Prednisolone	50-24-8	NWQL	Pharmaceutical	LC-MS/MS	RLDQC	75	150	ng/L	Furlong and others, 2014
Prednisone	53-03-2	NWQL	Pharmaceutical	LC-MS/MS	RLDQC	35	105	ng/L	Furlong and others, 2014
Promethazine	60-87-7	NWQL	Pharmaceutical	LC-MS/MS	RLDQC	57	114	ng/L	Furlong and others, 2014
Propoxyphene	469-62-5	NWQL	Pharmaceutical	LC-MS/MS	RLDQC	14	28	ng/L	Furlong and others, 2014
Propranolol	525-66-6	NWQL	Pharmaceutical	LC-MS/MS	RLDQC	4.5	26	ng/L	Furlong and others, 2014
Pseudoephedrine + Ephedrine	--	NWQL	Pharmaceutical	LC-MS/MS	RLDQC	1.5	6	ng/L	Furlong and others, 2014
Quinine	130-95-0	NWQL	Pharmaceutical	LC-MS/MS	RLDQC	16	80	ng/L	Furlong and others, 2014
Raloxifene	84449-90-1	NWQL	Pharmaceutical	LC-MS/MS	RLDQC	40	80	ng/L	Furlong and others, 2014
Ranitidine	66357-35-5	NWQL	Pharmaceutical	LC-MS/MS	RLDQC	96	192	ng/L	Furlong and others, 2014
Sertraline	79617-96-2	NWQL	Pharmaceutical	LC-MS/MS	RLDQC	3.2	16	ng/L	Furlong and others, 2014
Sitagliptin	486460-32-6	NWQL	Pharmaceutical	LC-MS/MS	RLDQC	19	97	ng/L	Furlong and others, 2014
Sulfadimethoxine	122-11-2	NWQL	Pharmaceutical	LC-MS/MS	RLDQC	7	14	ng/L	Furlong and others, 2014
Sulfamethizole	144-82-1	NWQL	Pharmaceutical	LC-MS/MS	RLDQC	21	104	ng/L	Furlong and others, 2014
Sulfamethoxazole	723-46-6	NWQL	Pharmaceutical	LC-MS/MS	RLDQC	5	20	ng/L	Furlong and others, 2014
Tamoxifen	10540-29-1	NWQL	Pharmaceutical	LC-MS/MS	MRL	--	270	ng/L	Furlong and others, 2014
Temazepam	846-50-4	NWQL	Pharmaceutical	LC-MS/MS	RLDQC	9.2	18	ng/L	Furlong and others, 2014
Theophylline	58-55-9	NWQL	Pharmaceutical	LC-MS/MS	RLDQC	40	80	ng/L	Furlong and others, 2014
Thiabendazole	148-79-8	NWQL	Pharmaceutical	LC-MS/MS	RLDQC	2	4	ng/L	Furlong and others, 2014
Tiotropium	186691-13-4	NWQL	Pharmaceutical	LC-MS/MS	RLDQC	25	50	ng/L	Furlong and others, 2014
Tramadol	27203-92-5	NWQL	Pharmaceutical	LC-MS/MS	RLDQC	3.7	7.4	ng/L	Furlong and others, 2014
Triamterene	396-01-0	NWQL	Pharmaceutical	LC-MS/MS	RLDQC	2.6	5.2	ng/L	Furlong and others, 2014
Trimethoprim	738-70-5	NWQL	Pharmaceutical	LC-MS/MS	RLDQC	1.6	20	ng/L	Furlong and others, 2014
Valacyclovir	124832-26-4	NWQL	Pharmaceutical	LC-MS/MS	RLDQC	33	163	ng/L	Furlong and others, 2014
Venlafaxine	93413-69-5	NWQL	Pharmaceutical	LC-MS/MS	RLDQC	2.6	5.2	ng/L	Furlong and others, 2014
Verapamil	52-53-9	NWQL	Pharmaceutical	LC-MS/MS	RLDQC	70	140	ng/L	Furlong and others, 2014
Warfarin	81-81-2	NWQL	Pharmaceutical	LC-MS/MS	RLDQC	3	6	ng/L	Furlong and others, 2014
1,1,1,2-Tetrachloroethane	630-20-6	NWQL	Volatile organic compound	GC-MS	RLDQC	0.02	0.04	ug/L	Rose and others, 2016
1,1,1-Trichloroethane	71-55-6	NWQL	Volatile organic compound	GC-MS	RLDQC	0.015	0.03	ug/L	Rose and others, 2016
1,1,2-Trichloroethane	79-00-5	NWQL	Volatile organic compound	GC-MS	RLDQC	0.023	0.046	ug/L	Rose and others, 2016
1,1-Dichloro-2-propanone	513-88-2	NWQL	Volatile organic compound	GC-MS	RLDQC	0.12	0.24	ug/L	Rose and others, 2016
1,1-Dichloroethane	75-34-3	NWQL	Volatile organic compound	GC-MS	RLDQC	0.022	0.044	ug/L	Rose and others, 2016
1,1-Dichloroethylene	75-35-4	NWQL	Volatile organic compound	GC-MS	RLDQC	0.012	0.025	ug/L	Rose and others, 2016
1,1-Difluoroethane (HFC-152a)	75-37-6	NWQL	Volatile organic compound	GC-MS	RLDQC	0.012	0.025	ug/L	Rose and others, 2016
1,2,3,4-Tetrahydronapthalene	119-64-2	NWQL	Volatile organic compound	GC-MS	RLDQC	0.04	0.08	ug/L	Rose and others, 2016
1,2,3-Trichloropropane	96-18-4	NWQL	Volatile organic compound	GC-MS	RLDQC	0.003	0.006	ug/L	Rose and others, 2016
1,2,4-Trichlorobenzene	120-82-1	NWQL	Volatile organic compound	GC-MS	RLDQC	0.04	0.08	ug/L	Rose and others, 2016
1,2,4-Trimethylbenzene	95-63-6	NWQL	Volatile organic compound	GC-MS	RLDQC	0.016	0.032	ug/L	Rose and others, 2016
1,2-Dibromo-3-chloropropane	96-12-8	NWQL	Volatile organic compound	GC-MS	RLDQC	0.01	0.02	ug/L	Rose and others, 2016
1,2-Dibromoethane	106-93-4	NWQL	Volatile organic compound	GC-MS	RLDQC	0.002	0.004	ug/L	Rose and others, 2016
1,2-Dichlorobenzene	95-50-1	NWQL	Volatile organic compound	GC-MS	RLDQC	0.014	0.028	ug/L	Rose and others, 2016
1,2-Dichloroethane	107-06-2	NWQL	Volatile organic compound	GC-MS	RLDQC	0.01	0.08	ug/L	Rose and others, 2016
1,2-Dichloropropane	78-87-5	NWQL	Volatile organic compound	GC-MS	RLDQC	0.002	0.004	ug/L	Rose and others, 2016
1,2-Dichlorotetrafluoroethane (CFC-114)	76-14-2	NWQL	Volatile organic compound	GC-MS	RLDQC	0.015	0.03	ug/L	Rose and others, 2016
1,3-Butadiene	106-99-0	NWQL	Volatile organic compound	GC-MS	RLDQC	0.04	0.08	ug/L	Rose and others, 2016
1,3-Dioxolane	646-06-0	NWQL	Volatile organic compound	GC-MS	RLDQC	0.19	0.38	ug/L	Rose and others, 2016
1,4-Dichlorobenzene	106-46-7	NWQL	Volatile organic compound	GC-MS	RLDQC	0.013	0.026	ug/L	Rose and others, 2016
1,4-Dioxane	123-91-1	NWQL	Volatile organic compound	GC-MS	RLDQC	0.1	0.2	ug/L	Rose and others, 2016
1-Butanol	71-36-3	NWQL	Volatile organic compound	GC-MS	RLDQC	0.4	0.8	ug/L	Rose and others, 2016
1-Chloro-1,1-difluoroethane (HCFC-142b)	75-68-3	NWQL	Volatile organic compound	GC-MS	MRL	--	0.08	ug/L	Rose and others, 2016
1-Methoxy-4-(2-propenyl)benzene	140-67-0	NWQL	Volatile organic compound	GC-MS	RLDQC	0.2	0.4	ug/L	Rose and others, 2016
1-Octanol	111-87-5	NWQL	Volatile organic compound	GC-MS	RLDQC	0.9	1.8	ug/L	Rose and others, 2016
2,2-Dichloro-1,1,1-trifluoroethane (HCFC-123)	306-83-2	NWQL	Volatile organic compound	GC-MS	RLDQC	0.012	0.025	ug/L	Rose and others, 2016
2,6-Dimethyl-4-heptanone	108-83-8	NWQL	Volatile organic compound	GC-MS	RLDQC	0.016	0.032	ug/L	Rose and others, 2016
2-Ethoxyethyl acetate	111-15-9	NWQL	Volatile organic compound	GC-MS	RLDQC	2.7	5.4	ug/L	Rose and others, 2016
2-Ethyl-1-hexanol	104-76-7	NWQL	Volatile organic compound	GC-MS	MRL	--	4.4	ug/L	Rose and others, 2016
2-Methylpropyl acetate	110-19-0	NWQL	Volatile organic compound	GC-MS	RLDQC	0.014	0.028	ug/L	Rose and others, 2016
2-Nitropropane	79-46-9	NWQL	Volatile organic compound	GC-MS	RLDQC	0.06	0.12	ug/L	Rose and others, 2016
2-Propen-1-ol	107-18-6	NWQL	Volatile organic compound	GC-MS	RLDQC	3.9	7.8	ug/L	Rose and others, 2016
4-Methyl-2-pentanol	108-11-2	NWQL	Volatile organic compound	GC-MS	RLDQC	0.1	0.2	ug/L	Rose and others, 2016
5-Methyl-2-hexanon	110-12-3	NWQL	Volatile organic compound	GC-MS	RLDQC	0.011	0.022	ug/L	Rose and others, 2016
Acetonitrile	75-05-8	NWQL	Volatile organic compound	GC-MS	RLDQC	0.4	0.8	ug/L	Rose and others, 2016
alpha-Terpineol	98-55-5	NWQL	Volatile organic compound	GC-MS	RLDQC	1.1	2.2	ug/L	Rose and others, 2016
Benzene	71-43-2	NWQL	Volatile organic compound	GC-MS	RLDQC	0.013	0.026	ug/L	Rose and others, 2016
Bromochloromethane	74-97-5	NWQL	Volatile organic compound	GC-MS	RLDQC	0.03	0.06	ug/L	Rose and others, 2016
Bromomethane	74-83-9	NWQL	Volatile organic compound	GC-MS	RLDQC	0.1	0.2	ug/L	Rose and others, 2016
Butanal	123-72-8	NWQL	Volatile organic compound	GC-MS	RLDQC	0.19	0.38	ug/L	Rose and others, 2016
Butane	106-97-8	NWQL	Volatile organic compound	GC-MS	RLDQC	0.04	0.08	ug/L	Rose and others, 2016
Carbon disulfide	75-15-0	NWQL	Volatile organic compound	GC-MS	RLDQC	0.05	0.1	ug/L	Rose and others, 2016
Chlorobenzene	108-90-7	NWQL	Volatile organic compound	GC-MS	RLDQC	0.013	0.026	ug/L	Rose and others, 2016
Chlorodifluoromethane (HCFC-22)	75-45-6	NWQL	Volatile organic compound	GC-MS	MRL	--	0.04	ug/L	Rose and others, 2016
Chloromethane	74-87-3	NWQL	Volatile organic compound	GC-MS	MRL	--	0.2	ug/L	Rose and others, 2016
Chloropicrin	76-06-2	NWQL	Volatile organic compound	GC-MS	RLDQC	0.07	0.14	ug/L	Rose and others, 2016
cis-1,2-Dichloroethene	156-59-2	NWQL	Volatile organic compound	GC-MS	RLDQC	0.012	0.025	ug/L	Rose and others, 2016
cis-1,3-Dichloropropene	10061-01-5	NWQL	Volatile organic compound	GC-MS	RLDQC	0.05	0.1	ug/L	Rose and others, 2016
Crotonaldehyde	123-73-9	NWQL	Volatile organic compound	GC-MS	RLDQC	1.3	2.6	ug/L	Rose and others, 2016
Cyclohexanone	108-94-1	NWQL	Volatile organic compound	GC-MS	RLDQC	0.6	1.2	ug/L	Rose and others, 2016
Dichlorofluoromethane (HCFC-21)	75-43-4	NWQL	Volatile organic compound	GC-MS	RLDQC	0.008	0.025	ug/L	Rose and others, 2016
Dichloromethane	75-09-2	NWQL	Volatile organic compound	GC-MS	MRL	--	0.04	ug/L	Rose and others, 2016
Dimethoxymethane	109-87-5	NWQL	Volatile organic compound	GC-MS	RLDQC	0.022	0.044	ug/L	Rose and others, 2016
Ethyl acetate	141-78-6	NWQL	Volatile organic compound	GC-MS	RLDQC	0.03	0.06	ug/L	Rose and others, 2016
Ethylbenzene	100-41-4	NWQL	Volatile organic compound	GC-MS	RLDQC	0.018	0.036	ug/L	Rose and others, 2016
Hexachlorocyclopentadiene	77-47-4	NWQL	Volatile organic compound	GC-MS	RLDQC	5	10	ug/L	Rose and others, 2016
Hexane	110-54-3	NWQL	Volatile organic compound	GC-MS	RLDQC	0.034	0.068	ug/L	Rose and others, 2016
Isophorone	78-59-1	NWQL	Volatile organic compound	GC-MS	RLDQC	1.2	2.4	ug/L	Rose and others, 2016
Isopropyl acetate	108-21-4	NWQL	Volatile organic compound	GC-MS	RLDQC	0.005	0.01	ug/L	Rose and others, 2016
Isopropyl alcohol	67-63-0	NWQL	Volatile organic compound	GC-MS	MRL	--	1.8	ug/L	Rose and others, 2016
m- and p-Xylene	179601-23-1	NWQL	Volatile organic compound	GC-MS	RLDQC	0.04	0.08	ug/L	Rose and others, 2016
Methyl acetate	79-20-9	NWQL	Volatile organic compound	GC-MS	RLDQC	0.07	0.14	ug/L	Rose and others, 2016
Naphthalene	91-20-3	NWQL	Volatile organic compound	GC-MS	RLDQC	0.03	0.26	ug/L	Rose and others, 2016
Nitrobenzene	98-95-3	NWQL	Volatile organic compound	GC-MS	RLDQC	0.7	1.4	ug/L	Rose and others, 2016
N-Nitrosodiethylamine	55-18-5	NWQL	Volatile organic compound	GC-MS	RLDQC	1.3	5.2	ug/L	Rose and others, 2016
n-Pentanal	110-62-3	NWQL	Volatile organic compound	GC-MS	RLDQC	0.027	0.054	ug/L	Rose and others, 2016
n-Pentane	109-66-0	NWQL	Volatile organic compound	GC-MS	RLDQC	0.033	0.066	ug/L	Rose and others, 2016
n-Propylbenzene	103-65-1	NWQL	Volatile organic compound	GC-MS	RLDQC	0.018	0.036	ug/L	Rose and others, 2016
o-Xylene	95-47-6	NWQL	Volatile organic compound	GC-MS	RLDQC	0.016	0.032	ug/L	Rose and others, 2016
Propyl acetate	109-60-4	NWQL	Volatile organic compound	GC-MS	RLDQC	0.016	0.032	ug/L	Rose and others, 2016
sec-Butylbenzene	135-98-8	NWQL	Volatile organic compound	GC-MS	RLDQC	0.017	0.034	ug/L	Rose and others, 2016
Styrene	100-42-5	NWQL	Volatile organic compound	GC-MS	MRL	--	0.042	ug/L	Rose and others, 2016
tert-Butyl alcohol	75-65-0	NWQL	Volatile organic compound	GC-MS	MRL	--	0.24	ug/L	Rose and others, 2016
tert-Butyl methyl ether (MTBE)	1634-04-4	NWQL	Volatile organic compound	GC-MS	RLDQC	0.006	0.012	ug/L	Rose and others, 2016
Tetrachloroethylene	127-18-4	NWQL	Volatile organic compound	GC-MS	RLDQC	0.029	0.058	ug/L	Rose and others, 2016
Tetrachloromethane	56-23-5	NWQL	Volatile organic compound	GC-MS	RLDQC	0.03	0.06	ug/L	Rose and others, 2016
Toluene	108-88-3	NWQL	Volatile organic compound	GC-MS	MRL	--	0.2	ug/L	Rose and others, 2016
trans-1,2-Dichloroethylene	156-60-5	NWQL	Volatile organic compound	GC-MS	RLDQC	0.012	0.025	ug/L	Rose and others, 2016
trans-1,3-Dichloropropene	10061-02-6	NWQL	Volatile organic compound	GC-MS	RLDQC	0.05	0.1	ug/L	Rose and others, 2016
Trichloroethylene	79-01-6	NWQL	Volatile organic compound	GC-MS	RLDQC	0.012	0.025	ug/L	Rose and others, 2016
Vinyl chloride	75-01-4	NWQL	Volatile organic compound	GC-MS	RLDQC	0.03	0.06	ug/L	Rose and others, 2016
Anatoxin-a	64285-06-9	OGRL	Cyanotoxin	ELISA	LOQ	--	0.15	ug/L	Loftin and others, 2016 and Graham and others, 2010
Cylindrospermopsin	143545-90-8	OGRL	Cyanotoxin	ELISA	LOQ	--	0.05	ug/L	Loftin and others, 2016 and Graham and others, 2010
Microcystin	101043-37-2	OGRL	Cyanotoxin	ELISA	LOQ	--	0.10	ug/L	Loftin and others, 2016 and Graham and others, 2010
Saxitoxin	35523-89-8	OGRL	Cyanotoxin	ELISA	LOQ	--	0.02	ug/L	Loftin and others, 2016 and Graham and others, 2010
Table S2. Method information for all analytes measured in surface-water samples collected in Montana, 2022-23.
[NWIS, USGS National Water Information System; CASRN, Chemical Abstract Services Registry Number; --, information not available or not applicable; RCL, USGS Redox Chemistry Laboratory, Boulder, Colorado; ATECL, USGS Analytical Trace Element Chemistry Laboratory, Boulder, Colorado; OCRL, USGS Organic Chemistry Research Laboratory, Sacramento, California; NWQL, USGS National Water Quality Laborator…
Any use of trade, firm, or product names is for descriptive purposes only and does not imply endorsement by the U.S. Government.

## Sheet: TABLE S3 PFAS METHODS
Parameter name	Abbreviation	Biofilms (ng/g ww)	Fish filet (ng/g ww)	Fish whole blood (ng/g)	Sediment (ng/g dw)
Perfluorotetradecanoic acid	PFTA	0.038-0.041	0.12-0.16	0.048-1.4	NA
1H,1H,2H,2H-Perfluorodecanesulfonate	8:2 FTS	0.15-0.017	0.38-0.64	0.38-5.4	0.13-0.245
1H,1H,2H,2H-Perfluorohexanesulfonate	4:2 FTS	0.14-0.17	0.37-0.76	0.28-5.4	0.139-0.288
1H,1H,2H,2H-Perfluorooctanesulfonate	6:2 FTS	0.14-0.17	0.46-0.62	0.19-1.3	0.125-0.260
4,8-Dioxa-3H-perfluorononanoic acid	ADONA	0.14-0.17	0.46-0.63	0.19-5.4	0.139-0.288
9-Chlorohexadecafluoro-3-oxanonane-1-sulfonic acid	9Cl-PF3ONS	0.14-0.17	0.37-0.62	0.3-5.4	0.139-0.288
Hexafluoropropylene oxide dimer acid	HFPO-DA (GenX)	0.14-0.17	0.46-0.62	0.3-5.4	0.139-0.288
N-ethyl perfluorooctanesulfonamidoacetic acid	N-EtFOSAA	0.036-0.041	0.091-0.12	0.048-1.4	NA
N-Methylperfluorooctanesulfonamidoacetic acid	N-MeFOSAA	0.036-0.041	0.091-0.16	0.048-1.4	NA
Perfluorobutanesulfonic acid	PFBS	0.036-0.041	0.091-0.16	0.048-1.4	0.0346-0.072
Perfluorobutanoic acid	PFBA	0.14-0.17	0.53-0.56	0.29-5.4	0.139-0.288
Perfluorodecanesulfonic acid	PFDS	0.036-0.041	0.12-0.16	0.092-1.4	0.0346-0.072
Perfluorodecanoic acid	PFDA	0.036-0.041	0.12-0.16	0.17-1.4	0.0346-0.072
Perfluorododecanoic acid	PFDoA	0.036-0.041	0.12-0.16	0.12-1.4	0.027-0.057
Perfluoroheptanesulfonate	PFHpS	0.036-0.041	0.091-0.16	0.064-1.4	0.0346-0.072
Perfluoroheptanoic acid	PFHpA	0.036-0.041	0.091-0.16	0.064-1.4	0.0346-0.072
Perfluorohexanesulfonic acid	PFHxS	0.036-0.041	0.12-0.16	0.048-1.4	0.0346-0.072
Perfluorohexanoic acid	PFHxA	0.038-0.041	0.11-0.16	0.048-1.4	0.0346-0.072
Perfluorononanesulfonic acid	PFNS	0.036-0.041	0.12-0.16	0.17-1.4	0.0346-0.072
Perfluorononanoic acid	PFNA	0.036-0.041	0.12-0.16	0.17-1.4	0.0346-0.072
Perfluorooctanesulfonamide	PFOSA	0.036-0.041	0.094-0.16	0.048-1.4	0.0346-0.0421
Perfluorooctanesulfonic acid	PFOS	0.036-0.041	0.11-0.15	0.11-0.15	0.0346-0.0421
Perfluorooctanoic acid	PFOA	0.036-0.041	0.091-0.16	0.064-1.4	0.0346-0.0421
Perfluoropentanesulfonate	PFPeS	0.036-0.041	0.091-0.16	0.048-1.4	0.0346-0.0723
Perfluoropentanoic acid	PFPeA	0.071-0.077	0.18-0.31	0.097-2.7	0.0693-0.144
Perfluorotridecanoic acid	PFTrDA	0.038-0.041	0.12-0.16	0.12-1.4	0.0346-0.072
Perfluoroundecanoic acid	PFUdA	0.036-0.041	0.11-0.15	0.17-1.4	0.0346-0.072
11-Chloroeicosafluoro-3-oxaundecane-1-sulfonic acid	11Cl-PF3OYUdS	0.14-0.17	0.47-0.63	0.3-5.4	0.139-0.289
3-Perfluoroheptyl propanoic acid	7:3 FTCA	NA	NA	NA	0.866-1.8
3-Perfluoropentyl propanoic acid	5:3 FTCA	NA	NA	NA	0.866-1.8
3-Perfluoropropyl propanoic acid	3:3 FTCA	NA	NA	NA	0.139-1.8
N-Ethylperfluorooctanesulfonamide	N-EtFOSA	NA	NA	NA	0.097-0.202
N-Ethylperfluorooctanesulfonamidoethanol	N-EtFOSE	NA	NA	NA	0.346-0.72
N-Methylperfluorooctanesulfonamide	N-MeFOSA	NA	NA	NA	0.0382
N-Methylperfluorooctanesulfonamidoethanol	N-MeFOSE	NA	NA	NA	0.346-0.72
Nonafluoro-3,6-dioxaheptanoic acid	NFDHA	NA	NA	NA	0.0693-0.144
Perfluoro(2-ethoxyethane)sulfonic acid	PFEESA	NA	NA	NA	0.0346-0.072
Perfluoro-3-methoxypropanoic acid	PFMPA	NA	NA	NA	0.0693-0.144
Perfluoro-4-methoxybutanoic acid	PFMBA	NA	NA	NA	0.0346-0.072
Perfluorotetradecanoic acid	PFTeDA	NA	NA	NA	0.0346-0.072
Table S3. Range in method detection limits provided by the analyzing laboratories for individual per- and polyfluroalkyl substances (PFAS) measured in sediment, biofilms and fish (filet and whole blood) samples collected from Montana, 2023
[Sediment samples were analyzed for 40 individual PFAS by SGS AXYS, British Columbia, Canada and concentrations reported as ng/g dry weight. Biofilms, fish filet and fish whole blood were analyzed for 28 individual PFAS by RTI Laboratories, Livonia, Michigan, USA. Concentrations for biofilms and filets are reported as ng/g wet weight and whole blood are reported as ng/g.]
[NA, not analyzed; ww, wet weight; dw, dry weight; ng/g, nanograms per gram]

## Sheet: TABLE S4. DETECTED ORGANICS
USGS Station name	Site code	Sampling date (yyyymmdd)	PFOA	PFNA	6:2 FTS	8:2 FTS	PFUnDA	Anatoxin-A	Microcystin	Azoxystrobin	Bentazon	Diuron	Glyphosate	Indaziflam	Propiconazole	Prometon	Tebuconazole	Acetonitrile	Benzene	Butanal	Carbon disulfide	Methyl acetate	n-Pentane	n-Pentanal	Trichloromethane	Acetaminophen	Caffeine	Metformin	Methocarbamol	Methotrexate	Nicotine	Propranolol	Trimethoprim	Count Detections (ALL)	Sum Concentrations (ALL) ug/L	Count PEST	Sum conc PEST ug/L	Count VOC	Sum conc VOC ug/L	Count PHARM	Sum conc PHARM ug/L	Count PFAS	Sum conc PFAS ug/L
Little Bighorn R nr Sloan Ditch nr Wyola MT	LBH2	2022-08-10 12:00:00	0.0002	nd	nd	nd	nd	nd	nd	nd	nd	nd	nd	nd	nd	nd	nd	nd	nd	nd	nd	nd	nd	nd	nd	nd	nd	nd	nd	nd	nd	nd	nd	0	0	0	0	0	0	0	0	--	--
L Bighorn R bl Lodge Grass Cr nr Lodge Grass MT	LBH3	2022-08-09 10:30:00	nd	nd	0.0038	nd	nd	nd	nd	nd	nd	nd	nd	nd	nd	nd	nd	nd	0.012	nd	E 0.011	nd	nd	nd	nd	nd	nd	0.0045	nd	nd	nd	nd	nd	2	0.0275	0	0	2	0.023	1	0.0045	--	--
L Bighorn R bl Med Tail Coulee nr Crow Agency MT	LBH6	2022-08-09 12:25:00	nd	nd	nd	nd	nd	nd	nd	nd	nd	nd	nd	nd	nd	nd	nd	nd	0.011	nd	E 0.010	nd	nd	nd	nd	nd	nd	0.0105	nd	nd	nd	nd	nd	2	0.0315	0	0	2	0.021	1	0.0105	--	--
Little Bighorn R ab Agency Canal nr Crow Agency MT	LBH7	2022-08-09 13:40:00	nd	nd	nd	0.0001	nd	nd	nd	nd	nd	nd	nd	nd	nd	nd	nd	nd	nd	nd	E 0.016	nd	nd	0.043	nd	nd	E 0.0361	nd	nd	nd	nd	nd	nd	1	0.0951	0	0	2	0.059	1	0.0361	--	--
L Bighorn R bl Heritage Rd brdg at Crow Agency MT	LBH8	2022-08-10 09:00:00	nd	nd	nd	nd	nd	nd	nd	nd	nd	nd	nd	nd	nd	nd	nd	nd	0.01	nd	E 0.011	nd	nd	nd	0.01	nd	nd	nd	nd	nd	nd	nd	nd	2	0.031	0	0	3	0.031	0	0	--	--
Little Bighorn R at Pitch's nr Crow Agency, MT	LBH89	2022-08-10 10:00:00	nd	nd	nd	nd	nd	nd	0.56	nd	nd	nd	nd	nd	nd	nd	nd	nd	nd	nd	nd	nd	nd	nd	0.01	nd	nd	0.0458	0.0198	nd	nd	nd	nd	3	0.0756	0	0	1	0.01	2	0.0656	--	--
Plenty Coups State Park Spring at Pryor, MT	PC1	2023-07-24 08:00:00	nd	nd	0.002	nd	nd	nd	nd	nd	nd	nd	0.09	nd	nd	0.0011	nd	nd	nd	nd	nd	nd	nd	nd	nd	nd	nd	nd	nd	nd	0.0048232	nd	nd	3	0.0959232	2	0.0911	0	0	1	0.0048232	1	0.002
Pryor Creek at Sundance Bridge, near Pryor, MT	PC2	2023-07-24 09:20:00	nd	nd	nd	nd	nd	nd	nd	nd	nd	nd	0.08	nd	nd	nd	nd	nd	nd	nd	nd	nd	nd	nd	nd	nd	nd	nd	nd	0.0129127	nd	nd	nd	2	0.0929127	1	0.08	0	0	1	0.0129127	0	0
Ft Smith WW Lagoon at Ft Smith, MT	BH1	2023-07-24 12:00:00	nd	0.0001	nd	nd	nd	--	--	0.0011	0.0011	0.0015	nd	nd	nd	0.0016	nd	nd	nd	0.07	E 0.013	nd	nd	nd	nd	nd	0.037035	0.0169501	nd	nd	nd	nd	nd	7	0.142285	4	0.0053	2	0.083	2	0.0539851	1	0.0001
Unnamed pond nr Co Rd 313, St Xavier, MT	BH2*	2023-07-25 07:00:00	nd	nd	nd	nd	nd	0.21	nd	0.177	0.0013	nd	1.1	nd	0.0049	nd	0.0011	0.2	nd	0.23	E 0.178	nd	nd	nd	nd	nd	nd	0.0273302	nd	nd	nd	nd	nd	8	1.91963	5	1.2843	3	0.608	1	0.0273302	0	0
Little Bighorn R nr Sloan Ditch nr Wyola MT	LBH2	2023-07-26 07:30:00	nd	nd	nd	nd	nd	nd	nd	nd	nd	nd	nd	nd	nd	nd	nd	nd	nd	0.04	nd	nd	nd	nd	nd	nd	nd	nd	nd	nd	nd	nd	nd	1	0.04	0	0	1	0.04	0	0	0	0
L Bighorn R bl Lodge Grass Cr nr Lodge Grass MT	LBH3	2023-07-26 09:00:00	nd	nd	nd	nd	nd	nd	nd	nd	nd	nd	nd	nd	nd	nd	nd	nd	nd	0.07	E 0.026	nd	nd	nd	nd	nd	nd	nd	nd	nd	nd	nd	nd	1	0.096	0	0	2	0.096	0	0	0	0
Irr OF to L Big Horn R Oxbow nr Lodge Grass, MT	LBH4*	2023-07-26 11:00:00	nd	0.0003	nd	nd	nd	nd	nd	nd	nd	nd	nd	0.0016	nd	nd	nd	nd	nd	0.35	E 0.115	0.01	0.061	nd	nd	nd	nd	nd	nd	nd	nd	nd	nd	4	0.5376	1	0.0016	4	0.536	0	0	1	0.0003
Irrigation ditch near Garryowen, MT	LBH5*	2023-07-26 12:15:00	nd	nd	nd	nd	nd	nd	nd	nd	nd	nd	nd	nd	nd	nd	nd	nd	nd	0.03	nd	nd	nd	nd	nd	0.0122552	nd	nd	nd	nd	nd	nd	nd	2	0.0422552	0	0	1	0.03	1	0.0122552	0	0
L Bighorn R bl Med Tail Coulee nr Crow Agency MT	LBH6	2023-07-26 13:15:00	nd	nd	nd	nd	nd	nd	nd	nd	nd	nd	nd	nd	nd	nd	nd	nd	nd	0.06	nd	nd	nd	nd	nd	nd	nd	nd	nd	nd	nd	nd	nd	1	0.06	0	0	1	0.06	0	0	0	0
Little Bighorn R ab Agency Canal nr Crow Agency MT	LBH7	2023-07-25 08:30:00	nd	nd	nd	nd	0.0002	nd	nd	nd	nd	nd	0.13	nd	nd	nd	nd	nd	nd	0.06	nd	nd	nd	nd	nd	nd	nd	nd	nd	nd	nd	nd	0.0062395	3	0.19624	1	0.13	1	0.06	1	0.0062395	1	0.0002
L Bighorn R bl Heritage Rd brdg at Crow Agency MT	LBH8	2023-07-25 11:20:00	nd	nd	nd	nd	nd	nd	nd	nd	nd	nd	nd	nd	nd	nd	nd	nd	nd	0.09	E 0.025	nd	nd	nd	nd	nd	nd	nd	nd	nd	nd	0.0078625	nd	2	0.122862	0	0	2	0.115	1	0.0078625	0	0
Little Bighorn R at Pitch's nr Crow Agency, MT	LBH9	2023-07-25 12:30:00	nd	nd	nd	nd	nd	nd	nd	nd	nd	nd	nd	nd	nd	nd	nd	nd	nd	0.09	nd	nd	nd	nd	nd	nd	nd	nd	nd	nd	nd	nd	nd	1	0.09	0	0	1	0.09	0	0	0	0
Little Bighorn R bl Custer Cr, at Crow Agency, MT	LBH10	2023-07-25 10:00:00	nd	nd	nd	nd	nd	nd	nd	nd	nd	nd	nd	nd	nd	nd	nd	nd	nd	0.08	E 0.015	nd	nd	nd	nd	nd	nd	nd	nd	nd	nd	nd	nd	1	0.095	0	0	2	0.095	0	0	0	0
Number of detections (all)			1	2	2	1	1	1	1	2	2	1	4	1	1	2	1	1	3	11	10	1	1	1	2	1	2	5	1	1	1	1	1
Number of detections (% all samples)			5.26316	10.5263	10.5263	5.26316	5.26316	5.26316	5.26316	10.5263	10.5263	5.26316	21.0526	5.26316	5.26316	10.5263	5.26316	5.26316	15.7895	57.8947	52.6316	5.26316	5.26316	5.26316	10.5263	5.26316	10.5263	26.3158	5.26316	5.26316	5.26316	5.26316	5.26316
Compound group			PFAS	PFAS	PFAS	PFAS	PFAS	TOXIN	TOXIN	PEST	PEST	PEST	PEST	PEST	PEST	PEST	PEST	VOC	VOC	VOC	VOC	VOC	VOC	VOC	VOC	PHARM	PHARM	PHARM	PHARM	PHARM	PHARM	PHARM	PHARM
Reporting Level			0.00052	0.0002	0.0019	0.0001	0.0005	0.15	0.1	0.5	1	0.5	0.075	0.5	0.5	0.5	0.5	0.8	0.026	0.38	0.1	0.14	0.066	0.054	0.03	84	91	13	11	52	58	26	20
Units of measurement			ug/L	ug/L	ug/L	ug/L	ug/L	ug/L	ug/L	ug/L	ug/L	ug/L	ug/L	ug/L	ug/L	ug/L	ug/L	ug/L	ug/L	ug/L	ug/L	ug/L	ug/L	ug/L	ug/L	ug/L	ug/L	ug/L	ug/L	ug/L	ug/L	ug/L	ug/L
EPA ALB Freshwater Vertebrate, Acute				--	--	--	--	--	--	--	235	95000	660	21500	--	425	9800	1135	--	--	--	--	--	--	--	--	--	--	--	--	--	--	--	--
EPA ALB Freshwater Vertebrate, Chronic				--	--	--	--	--	--	--	147	9830	26.4	25700	--	15	6530	11	--	--	--	--	--	--	--	--	--	--	--	--	--	--	--	--
EPA ALB Freshwater Invertebrate, Acute				--	--	--	--	--	--	--	130	31150	87.5	25500	--	2400	12850	1440	--	--	--	--	--	--	--	--	--	--	--	--	--	--	--	--
EPA ALB Freshwater Invertebrate, Chronic				--	--	--	--	--	--	--	44	101200	0.83	49900	--	180	3450	120	--	--	--	--	--	--	--	--	--	--	--	--	--	--	--	--
EPA ALB Freshwater Non-Vascular Plants (ANVP)				--	--	--	--	--	--	--	49	4500	3.08	12100	--	21	98	170	--	--	--	--	--	--	--	--	--	--	--	--	--	--	--	--
EPA ALB Freshwater Vascular Plants (APV)				--	--	--	--	--	--	--	3400	5350	0.13	11900	--	3500	160	151	--	--	--	--	--	--	--	--	--	--	--	--	--	--	--	--
EPA HHR AWQC				--	--	--	--	15	--	8	--	--	--	--	--	--	--	--	--	--	--	--	--	--	--	--	--	--	--	--	--	--	--	--
EPA ALB Freshwater Vertebrate, Acute Exceedances				--	--	--		--	--	--	0	0	0	0	--	0	0	0	--	--	--	--	--	--	--	--	--	--	--	--	--	--	--	--
EPA ALB Freshwater Vertebrate, Chronic Exceedances				--	--	--		--	--	--	0	0	0	0	--	0	0	0	--	--	--	--	--	--	--	--	--	--	--	--	--	--	--	--
EPA ALB Freshwater Invertebrate, Acute Exceedances				--	--	--		--	--	--	0	0	0	0	--	0	0	0	--	--	--	--	--	--	--	--	--	--	--	--	--	--	--	--
EPA ALB Freshwater Invertebrate, Chronic Exceedances				--	--	--		--	--	--	0	0	0	0	--	0	0	0	--	--	--	--	--	--	--	--	--	--	--	--	--	--	--	--
EPA ALB Freshwater Non-Vascular Plants (ANVP) Exceedances				--	--	--		--	--	--	0	0	0	0	--	0	0	0	--	--	--	--	--	--	--	--	--	--	--	--	--	--	--	--
EPA ALB Freshwater Vascular Plants (APV) Exceedances				--	--	--		--	--	--	0	0	0	0	--	0	0	0	--	--	--	--	--	--	--	--	--	--	--	--	--	--	--	--
Table S4. Detected concentration results in surface-water samples, in micrograms per liter (ug/L), for organic compounds collected from three watershed in Montana 2022-23.
[USGS, U.S. Geological Survey; *, indicates site is not along the mainstem of river; nd, not detected; --; not applicable; E, estimated; yyyymmdd, year, month, day; PEST, pesticide; PHARM, pharmaceutical; VOC, volatile organic compound; TOXIN, algal toxin; ug/L, micrograms per liter]
All data are available from https://doi.org/10.5066/P9R7MV6I
Listed benchmark explanations:
Aquatic Life Benchmarks and Ecological Risk Assessments for Registered Pesticides | US EPA
Freshwater Vertebrate Acute Benchmark = Toxicity value x LOC. For acute Fish, toxicity value is generally the lowest 96-hour LC50 in a standardized test (usually with Rainbow Trout (Oncorhynchus mykiss); Fathead Minnow (Pimephales promelas); Bluegill Sunfish (Lepomis macrochirus)), and the LOC is 0.5.
Freshwater Vertebrate Chronic Benchmark = Toxicity value x LOC. For chronic Fish, toxicity value is usually the lowest NOEAC from a life-cycle or early life stage test (usually with Rainbow Trout (Oncorhynchus mykiss) or Fathead Minnow (Pimephales promelas), and the LOC is 1.
Freshwater Inertebrate Acute Benchmark = Toxicity value x LOC. For acute invertebrate, toxicity value is usually the lowest 48- or 96-hour EC50 or LC50 in a standardized test, and the LOC is 0.5.
Freshwater Inertebrate Chronic Benchmark = Toxicity value x LOC. For chronic invertebrates, toxicity value is usually the lowest NOAEC from a life-cycle test with invertebrates, and the LOC is 1.
Nonvascular Plants Benchmark = Toxicity value x LOC. For nonvascular plants, toxicity value is usually a short-term (less than 10 days) EC50 (usually with green algae or diatoms), and the LOC is 1.
Vascular Plants Benchmark = Toxicity value x LOC. For vascular plants, toxicity value is usually a short-term (less than 10 days) EC50 (usually with duckweed) and the LOC is 1.
EPA Recommended Human Health Recreational Ambient Water Quality Criteria or Swimming Advisories for Microcystins and Cylindrospermopsin

[truncated: 10 more sheets: TABLE S5. DETECTED INORGANICS, TABLE S6. MICROBIAL RESULTS, TABLE S7. PFAS_SED_BIOFILMS, TABLE S8. PFAS FISH TISSUE, TABLE S9a. SW BENCHMARKS, TABLE 9b HH BENCHMARKS, TABLE S10a. TQ WQS, TABLE S10b. TQ OPP_ALB, TABLE S10c. TQ RECREATIONAL, TABLE S10d. TQ HH]
